# Supplementary material for: A highly efficient heterogeneous copper-catalyzed chlorodeboronation of arylboronic acids leading to chlorinated arenes
Source: Royal Society of Chemistry journal article supplement (doi:10.1039/c6ra25666j), 2017-01-01
Supplement: c6ra25666j1.pdf [file c6ra25666j1.pdf]

## Supporting Information

### A highly efficient heterogeneous copper-catalyzed chlorodeboration of arylboronic acids leading to chlorinated arenes

Wen He,<sup>a,b</sup> Rongli Zhang,<sup>a</sup> and Mingzhong Cai<sup>\*a</sup>

<sup>a</sup> Key Laboratory of Functional Small Organic Molecule, Ministry of Education and College of Chemistry & Chemical Engineering, Jiangxi Normal University, Nanchang 330022, P. R. China

<sup>b</sup> Jiangxi Cancer Hospital, Nanchang 330029, P. R. China  
E-mail: mzcai@jxnu.edu.cn

#### The spectral data of compounds 2a-2x and compounds 3a-3i:

**3-Nitrochlorobenzene 2a.**<sup>1</sup> Yellow oil. <sup>1</sup>H NMR (400 MHz, CDCl<sub>3</sub>) δ (ppm): 8.23 (t, *J* = 1.8 Hz, 1H), 8.14 (dd, *J* = 8.2, 1.0 Hz, 1H), 7.69 (d, *J* = 8.0 Hz, 1H), 7.52 (t, *J* = 8.0 Hz, 1H); <sup>13</sup>C NMR (100 MHz, CDCl<sub>3</sub>) δ (ppm): 148.8, 135.4, 134.7, 130.4, 123.9, 121.7.

**4-Biphenyl chloride 2b.**<sup>1</sup> White solid; m.p.: 76-77 °C. <sup>1</sup>H NMR (400 MHz, CDCl<sub>3</sub>) δ (ppm): 7.54 (d, *J* = 7.2 Hz, 2H), 7.50 (d, *J* = 8.4 Hz, 2H), 7.43 (t, *J* = 7.6 Hz, 2H), 7.39 (d, *J* = 8.4 Hz, 2H), 7.35 (t, *J* = 7.2 Hz, 1H); <sup>13</sup>C NMR (100 MHz, CDCl<sub>3</sub>) δ (ppm): 140.0, 139.7, 133.4, 128.9, 128.4, 127.6, 127.0.

**N-(3-Chlorophenyl)acetamide 2c.**<sup>1</sup> White solid; m.p.: 77-78 °C. <sup>1</sup>H NMR (400 MHz, CDCl<sub>3</sub>) δ (ppm): 8.17 (br, 1H), 7.64 (s, 1H), 7.34 (d, *J* = 8.0 Hz, 1H), 7.19 (t, *J* = 8.0 Hz, 1H), 7.05 (d, *J* = 8.0 Hz, 1H), 2.16 (s, 3H); <sup>13</sup>C NMR (100 MHz, CDCl<sub>3</sub>) δ (ppm): 169.1, 139.2, 134.5, 129.9, 124.3, 120.2, 118.1, 24.4.

**tert-Butyl 4-chlorophenylcarbamate 2d.**<sup>2</sup> White solid; m.p.: 101-102 °C. <sup>1</sup>H NMR (400 MHz, CDCl<sub>3</sub>)  $\delta$  (ppm): 7.31 (d,  $J$  = 8.4 Hz, 2H), 7.19 (d,  $J$  = 8.8 Hz, 2H), 6.98 (s, 1H), 1.48 (s, 9H); <sup>13</sup>C NMR (100 MHz, CDCl<sub>3</sub>)  $\delta$  (ppm): 152.8, 137.4, 128.8, 127.6, 119.8, 40.0, 28.4.

**Benzyl 4-chlorophenylcarbamate 2e.**<sup>3</sup> White solid; m.p.: 108-109 °C. <sup>1</sup>H NMR (400 MHz, CDCl<sub>3</sub>)  $\delta$  (ppm): 7.40-7.31 (m, 7H), 7.25 (d,  $J$  = 8.4 Hz, 2H), 6.73 (s, 1H), 5.19 (s, 2H); <sup>13</sup>C NMR (100 MHz, CDCl<sub>3</sub>)  $\delta$  (ppm): 153.4, 136.5, 135.9, 131.0, 129.1, 128.7, 128.5, 128.3, 120.1, 67.2.

**N-(4-Chlorophenyl)methanesulfonamide 2f.**<sup>4</sup> White solid; m.p.: 123-124 °C; <sup>1</sup>H NMR (400 MHz, CDCl<sub>3</sub>)  $\delta$  (ppm): 7.32 (d,  $J$  = 8.8 Hz, 2H), 7.18 (d,  $J$  = 8.4 Hz, 2H), 6.88 (br, 1H), 3.01 (s, 3H); <sup>13</sup>C NMR (100 MHz, CDCl<sub>3</sub>)  $\delta$  (ppm): 135.2, 131.1, 129.8, 122.2, 39.5.

**4-Chlorophenyl acetate 2g.**<sup>1</sup> Colorless oil. <sup>1</sup>H NMR (400 MHz, CDCl<sub>3</sub>)  $\delta$  (ppm): 7.33 (dd,  $J$  = 6.8, 2.0 Hz, 2H), 7.02 (dd,  $J$  = 6.8, 2.0 Hz, 2H), 2.27 (s, 3H); <sup>13</sup>C NMR (100 MHz, CDCl<sub>3</sub>)  $\delta$  (ppm): 169.1, 149.2, 131.2, 129.5, 123.0, 21.0.

**2-Chloroanisole 2h.**<sup>1</sup> Colorless oil. <sup>1</sup>H NMR (400 MHz, CDCl<sub>3</sub>)  $\delta$  (ppm): 7.36 (dd,  $J$  = 7.8, 1.4 Hz, 1H), 7.22 (t,  $J$  = 7.8 Hz, 1H), 6.91 (t,  $J$  = 8.4 Hz, 1H), 6.88 (d,  $J$  = 7.6 Hz, 1H), 3.90 (s, 3H); <sup>13</sup>C NMR (100 MHz, CDCl<sub>3</sub>)  $\delta$  (ppm): 155.1, 130.3, 127.7, 122.5, 121.3, 112.2, 56.1.

**3-Chloroanisole 2i.**<sup>5</sup> Colorless oil. <sup>1</sup>H NMR (400 MHz, CDCl<sub>3</sub>)  $\delta$  (ppm): 7.19 (t,  $J$  = 8.0 Hz, 1H), 6.92 (d,  $J$  = 8.0 Hz, 1H), 6.89 (s, 1H), 6.78 (d,  $J$  = 8.0 Hz, 1H), 3.78 (s, 3H); <sup>13</sup>C NMR (100 MHz, CDCl<sub>3</sub>)  $\delta$  (ppm): 160.3, 134.9, 130.2, 120.8, 114.3, 112.6,

55.4.

**4-Chloroanisole 2j.**<sup>5</sup> Colorless oil. <sup>1</sup>H NMR (400 MHz, CDCl<sub>3</sub>)  $\delta$  (ppm): 7.23 (d,  $J$  = 8.8 Hz, 2H), 6.82 (d,  $J$  = 8.8 Hz, 2H), 3.78 (s, 3H); <sup>13</sup>C NMR (100 MHz, CDCl<sub>3</sub>)  $\delta$  (ppm): 158.3, 129.3, 125.6, 115.2, 55.5.

**5-Chlorobenzo[*d*][1,3]dioxole 2k.** Colorless oil. <sup>1</sup>H NMR (400 MHz, CDCl<sub>3</sub>)  $\delta$  (ppm): 6.83-6.77 (m, 2H), 6.72 (d,  $J$  = 8.4 Hz, 1H), 5.97 (s, 2H); <sup>13</sup>C NMR (100 MHz, CDCl<sub>3</sub>)  $\delta$  (ppm): 148.4, 146.5, 121.3, 110.2, 109.7, 108.9, 101.7; Anal. Calcd. for C<sub>7</sub>H<sub>5</sub>ClO<sub>2</sub>: C 53.70, H 3.22; found: C 53.48, H 3.40.

**4-Chlorobenzonitrile 2l.**<sup>6</sup> White solid; m.p.: 90-91 °C. <sup>1</sup>H NMR (400 MHz, CDCl<sub>3</sub>)  $\delta$  (ppm): 7.61 (d,  $J$  = 8.4 Hz, 2H), 7.47 (d,  $J$  = 8.4 Hz, 2H); <sup>13</sup>C NMR (100 MHz, CDCl<sub>3</sub>)  $\delta$  (ppm): 139.6, 133.4, 129.7, 118.0, 110.8.

**3-Chlorobenzonitrile 2m.**<sup>1</sup> White solid; m.p.: 40-41 °C. <sup>1</sup>H NMR (400 MHz, CDCl<sub>3</sub>)  $\delta$  (ppm): 7.63 (d,  $J$  = 1.6 Hz, 1H), 7.61-7.55 (m, 2H), 7.43 (t,  $J$  = 8.0 Hz, 1H); <sup>13</sup>C NMR (100 MHz, CDCl<sub>3</sub>)  $\delta$  (ppm): 135.3, 133.3, 132.0, 130.5, 130.3, 117.4, 114.1.

**1-Chloro-4-(trifluoromethyl)benzene 2n.**<sup>1</sup> Colorless oil. <sup>1</sup>H NMR (400 MHz, CDCl<sub>3</sub>)  $\delta$  (ppm): 7.56 (d,  $J$  = 8.4 Hz, 2H), 7.46 (d,  $J$  = 8.4 Hz, 2H); <sup>13</sup>C NMR (100 MHz, CDCl<sub>3</sub>)  $\delta$  (ppm): 138.1, 129.2 (q, <sup>2</sup> $J_{C-F}$  = 33.2 Hz), 129.1, 126.7 (q, <sup>3</sup> $J_{C-F}$  = 3.7 Hz), 123.8 (q, <sup>1</sup> $J_{C-F}$  = 270.2 Hz).

**4-Chlorobenzaldehyde 2o.**<sup>1</sup> White solid; m.p.: 46-47 °C. <sup>1</sup>H NMR (400 MHz, CDCl<sub>3</sub>)  $\delta$  (ppm): 9.99 (s, 1H), 7.83 (d,  $J$  = 8.0 Hz, 2H), 7.52 (d,  $J$  = 8.0 Hz, 2H); <sup>13</sup>C NMR (100 MHz, CDCl<sub>3</sub>)  $\delta$  (ppm): 190.8, 141.0, 134.8, 130.9, 129.5.

**1-(4-Chlorophenyl)ethanone 2p.**<sup>1</sup> Colorless oil. <sup>1</sup>H NMR (400 MHz, CDCl<sub>3</sub>)  $\delta$

(ppm): 7.90 (d,  $J = 8.4$  Hz, 2H), 7.44 (d,  $J = 8.8$  Hz, 2H), 2.59 (s, 3H);  $^{13}\text{C}$  NMR (100 MHz,  $\text{CDCl}_3$ )  $\delta$  (ppm): 196.7, 139.6, 135.5, 129.7, 128.9, 26.5.

**Methyl 4-chlorobenzoate 2q.**<sup>1</sup> White solid; m.p.: 42-43 °C.  $^1\text{H}$  NMR (400 MHz,  $\text{CDCl}_3$ )  $\delta$  (ppm): 7.97 (d,  $J = 8.4$  Hz, 2H), 7.41 (d,  $J = 8.4$  Hz, 2H), 3.92 (s, 3H);  $^{13}\text{C}$  NMR (100 MHz,  $\text{CDCl}_3$ )  $\delta$  (ppm): 166.2, 139.4, 131.0, 128.7, 128.6, 52.3.

**Ethyl 4-chlorobenzoate 2r.**<sup>7</sup> White solid; m.p.: 71-72 °C.  $^1\text{H}$  NMR (400 MHz,  $\text{CDCl}_3$ )  $\delta$  (ppm): 7.98 (d,  $J = 8.0$  Hz, 2H), 7.40 (d,  $J = 8.0$  Hz, 2H), 4.37 (q,  $J = 6.8$  Hz, 2H), 1.39 (t,  $J = 6.8$  Hz, 3H);  $^{13}\text{C}$  NMR (100 MHz,  $\text{CDCl}_3$ )  $\delta$  (ppm): 165.7, 139.2, 130.9, 129.0, 128.6, 61.2, 14.3.

**(4-Chlorophenyl)methanol 2s.**<sup>1</sup> White solid; m.p.: 69-70 °C.  $^1\text{H}$  NMR (400 MHz,  $\text{CDCl}_3$ )  $\delta$  (ppm): 7.31 (dd,  $J = 6.6, 1.8$  Hz, 2H), 7.26 (d,  $J = 8.4$  Hz, 2H), 4.62 (d,  $J = 4.8$  Hz, 2H), 2.10 (br, 1H);  $^{13}\text{C}$  NMR (100 MHz,  $\text{CDCl}_3$ )  $\delta$  (ppm): 139.3, 133.4, 128.7, 128.3, 64.5.

**5-Chloro-*N,N*-dimethylpyridin-2-amine 2t.** Colorless oil.  $^1\text{H}$  NMR (400 MHz,  $\text{CDCl}_3$ )  $\delta$  (ppm): 8.08 (s, 1H), 7.37 (dd,  $J = 8.8, 2.2$  Hz, 1H), 6.43 (d,  $J = 8.8$  Hz, 1H), 3.06 (s, 6H);  $^{13}\text{C}$  NMR (100 MHz,  $\text{CDCl}_3$ )  $\delta$  (ppm): 157.7, 146.0, 136.8, 128.8, 106.5, 38.2; Anal. Calcd. for  $\text{C}_7\text{H}_9\text{ClN}_2$ : C 53.68, H 5.79, N 17.89; found: C 53.42, H 5.51, N 17.68.

**1-Chloronaphthalene 2u.**<sup>8</sup> Colorless oil.  $^1\text{H}$  NMR (400 MHz,  $\text{CDCl}_3$ )  $\delta$  (ppm): 8.26 (d,  $J = 8.4$  Hz, 1H), 7.83 (d,  $J = 8.0$  Hz, 1H), 7.74 (d,  $J = 8.0$  Hz, 1H), 7.61-7.49 (m, 3H), 7.36 (t,  $J = 7.8$  Hz, 1H);  $^{13}\text{C}$  NMR (100 MHz,  $\text{CDCl}_3$ )  $\delta$  (ppm): 134.6, 132.0, 130.9, 128.2, 127.2, 127.0, 126.7, 126.2, 125.7, 124.4.

**2-Chlorotoluene 2v.**<sup>1</sup> Colorless oil. <sup>1</sup>H NMR (400 MHz, CDCl<sub>3</sub>)  $\delta$  (ppm): 7.32 (dd,  $J$  = 7.4, 1.8 Hz, 1H), 7.29-7.19 (m, 1H), 7.15-7.07 (m, 2H); <sup>13</sup>C NMR (100 MHz, CDCl<sub>3</sub>)  $\delta$  (ppm): 136.0, 134.4, 131.0, 129.1, 127.1, 126.6, 20.0.

**2-Chlorobiphenyl 2w.**<sup>1</sup> Colorless oil. <sup>1</sup>H NMR (400 MHz, CDCl<sub>3</sub>)  $\delta$  (ppm): 7.48-7.41 (m, 5H), 7.39-7.24 (m, 4H); <sup>13</sup>C NMR (100 MHz, CDCl<sub>3</sub>)  $\delta$  (ppm): 140.6, 139.4, 132.5, 131.4, 129.9, 129.4, 128.5, 128.0, 127.6, 126.8.

**2-Chloro-1,3-dimethylbenzene 2x.**<sup>1</sup> Colorless oil. <sup>1</sup>H NMR (400 MHz, CDCl<sub>3</sub>)  $\delta$  (ppm): 7.07-7.00 (m, 3H), 2.37 (s, 6H); <sup>13</sup>C NMR (100 MHz, CDCl<sub>3</sub>)  $\delta$  (ppm): 136.3, 134.7, 128.4, 125.9, 20.7.

**3-Bromonitrobenzene 3a.**<sup>1</sup> Yellow solid; m.p.: 57-58 °C. <sup>1</sup>H NMR (400 MHz, CDCl<sub>3</sub>)  $\delta$  (ppm): 8.39 (t,  $J$  = 1.8 Hz, 1H), 8.20-8.16 (m, 1H), 7.84 (d,  $J$  = 8.0 Hz, 1H), 7.45 (t,  $J$  = 8.0 Hz, 1H); <sup>13</sup>C NMR (100 MHz, CDCl<sub>3</sub>)  $\delta$  (ppm): 148.9, 137.6, 130.6, 126.8, 122.9, 122.2.

**4-Bromobenzonitrile 3b.**<sup>9</sup> White solid; m.p.: 112-113 °C. <sup>1</sup>H NMR (400 MHz, CDCl<sub>3</sub>)  $\delta$  (ppm): 7.64 (d,  $J$  = 8.4 Hz, 2H), 7.53 (d,  $J$  = 8.4 Hz, 2H); <sup>13</sup>C NMR (100 MHz, CDCl<sub>3</sub>)  $\delta$  (ppm): 133.4, 132.7, 128.0, 118.1, 111.3.

**4-Bromobenzaldehyde 3c.**<sup>10</sup> White solid; m.p.: 59-60 °C. <sup>1</sup>H NMR (400 MHz, CDCl<sub>3</sub>)  $\delta$  (ppm): 9.98 (s, 1H), 7.75 (d,  $J$  = 8.4 Hz, 2H), 7.69 (d,  $J$  = 8.0 Hz, 2H); <sup>13</sup>C NMR (100 MHz, CDCl<sub>3</sub>)  $\delta$  (ppm): 191.1, 132.5, 131.0, 129.8, 128.9.

**1-(4-Bromophenyl)ethanone 3d.**<sup>10</sup> White solid; m.p.: 50-51 °C. <sup>1</sup>H NMR (400 MHz, CDCl<sub>3</sub>)  $\delta$  (ppm): 7.82 (d,  $J$  = 8.4 Hz, 2H), 7.61 (d,  $J$  = 8.4 Hz, 2H), 2.59 (s, 3H); <sup>13</sup>C NMR (100 MHz, CDCl<sub>3</sub>)  $\delta$  (ppm): 197.0, 135.8, 131.9, 129.8, 128.3, 26.5.

**Methyl 4-bromobenzoate 3e.**<sup>10</sup> White solid; m.p.: 80-81 °C. <sup>1</sup>H NMR (400 MHz, CDCl<sub>3</sub>)  $\delta$  (ppm): 7.90 (d,  $J$  = 8.4 Hz, 2H), 7.58 (d,  $J$  = 8.4 Hz, 2H), 3.91 (s, 3H); <sup>13</sup>C NMR (100 MHz, CDCl<sub>3</sub>)  $\delta$  (ppm): 166.4, 131.7, 131.1, 129.1, 128.0, 52.3.

**4-Bromobiphenyl 3f.**<sup>10</sup> White solid; m.p.: 90-91 °C. <sup>1</sup>H NMR (400 MHz, CDCl<sub>3</sub>)  $\delta$  (ppm): 7.58-7.52 (m, 4H), 7.47-7.40 (m, 4H), 7.36 (t,  $J$  = 7.2 Hz, 1H); <sup>13</sup>C NMR (100 MHz, CDCl<sub>3</sub>)  $\delta$  (ppm): 140.2, 140.0, 131.9, 128.9, 128.8, 127.7, 127.0, 121.6.

**2-Bromoanisole 3g.**<sup>11</sup> Colorless oil. <sup>1</sup>H NMR (400 MHz, CDCl<sub>3</sub>)  $\delta$  (ppm): 7.53 (dd,  $J$  = 8.0, 1.6 Hz, 1H), 7.29-7.24 (m, 1H), 6.90 (dd,  $J$  = 8.2, 1.0 Hz, 1H), 6.85-6.81 (m, 1H); <sup>13</sup>C NMR (100 MHz, CDCl<sub>3</sub>)  $\delta$  (ppm): 155.9, 133.4, 128.5, 121.8, 112.1, 111.8, 56.2.

**4-Bromoanisole 3h.**<sup>12</sup> Colorless oil. <sup>1</sup>H NMR (400 MHz, CDCl<sub>3</sub>)  $\delta$  (ppm): 7.38-7.34 (m, 2H), 6.79-6.75 (m, 2H), 3.77 (s, 3H); <sup>13</sup>C NMR (100 MHz, CDCl<sub>3</sub>)  $\delta$  (ppm): 158.7, 132.2, 115.8, 112.8, 55.4.

**1-Bromonaphthalene 3i.**<sup>12</sup> Colorless oil. <sup>1</sup>H NMR (400 MHz, CDCl<sub>3</sub>)  $\delta$  (ppm): 8.23 (d,  $J$  = 8.4 Hz, 1H), 7.83-7.75 (m, 3H), 7.58 (t,  $J$  = 7.6 Hz, 1H), 7.51 (t,  $J$  = 7.4 Hz, 1H), 7.30 (t,  $J$  = 7.8 Hz, 1H); <sup>13</sup>C NMR (100 MHz, CDCl<sub>3</sub>)  $\delta$  (ppm): 134.7, 132.1, 129.9, 128.3, 127.9, 127.3, 127.1, 126.7, 126.2, 122.9.

## References

- 1 H. Wu and J. Hynes, Jr. *Org. Lett.*, 2010, **12**, 1192.
- 2 T. Vilaivan, *Tetrahedron Lett.*, 2006, **47**, 6739.
- 3 P. Wipf and J. P. Maciejewski, *Org. Lett.*, 2008, **10**, 4383.
- 4 C. You, F. Yao, T. Yan and M. Cai, *RSC Adv.*, 2016, **6**, 43605.
- 5 S. M. Maddox, C. J. Nalbandian, D. E. Smith and J. L. Gustafson, *Org. Lett.*,

- 2015, **17**, 1042.
- 6 C. M. Reddy, R. C. Gundakaram, S. Basavoju, M. T. Kirchner, K. A. Padmanabhan and G. R. Desiraju, *Chem. Commun.*, 2005, 3945.
  - 7 X. Shen, A. M. Hyde and S. L. Buchwald, *J. Am. Chem. Soc.*, 2010, **132**, 14076.
  - 8 G. A. Molander and L. N. Cavalcanti, *J. Org. Chem.*, 2011, **76**, 7195.
  - 9 V. D. Filimonov, M. Trusova, P. Postnikov, E. A. Krasnokutskaya, Y. M. Lee, H. Y. Hwang, H. Kim and K.-W. Chi, *Org. Lett.*, 2008, **10**, 3961.
  - 10 M.-L. Yao, M. S. Reddy, L. Yong, I. Walfish, D. W. Blevins and G. W. Kabalka, *Org. Lett.*, 2010, **12**, 700.
  - 11 R. H. Szumigala, P. N. Devine, D. R. Gauthier and R. P. Volante, *J. Org. Chem.*, 2004, **69**, 566.
  - 12 G. W. Kabalka and A. R. Mereddy, *Organometallics*, 2004, **23**, 4519.

**<sup>1</sup>H NMR and <sup>13</sup>C NMR spectra of compounds 2a-2x and compounds 3a-3i**

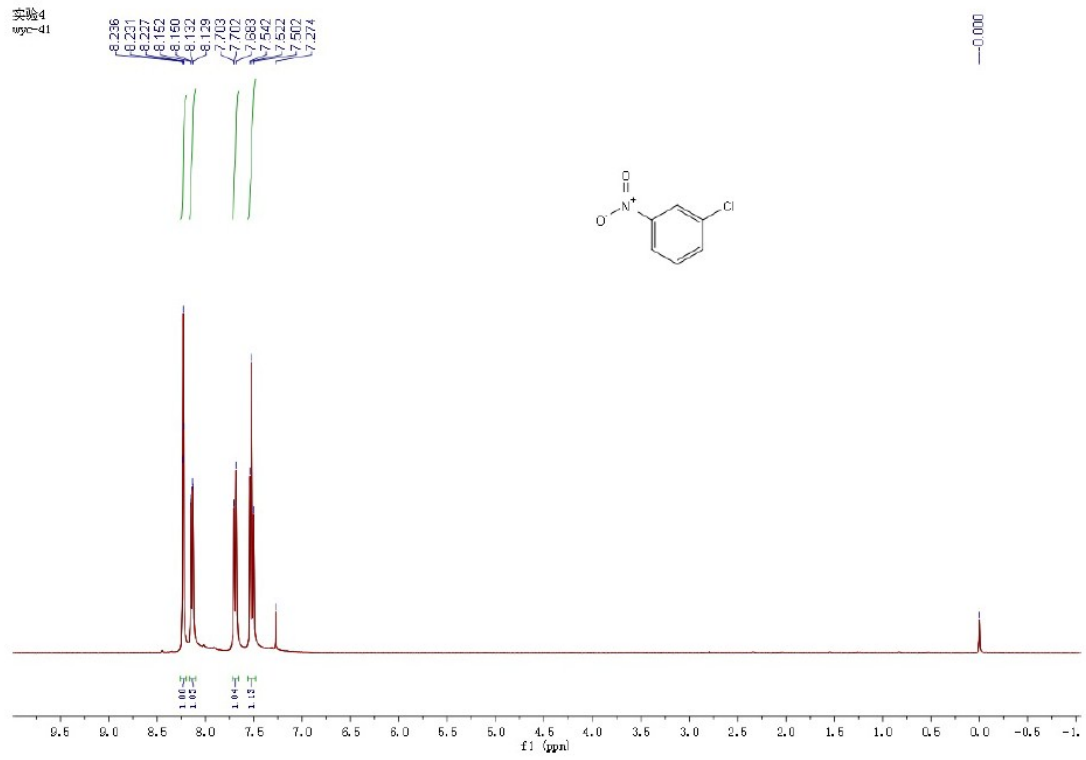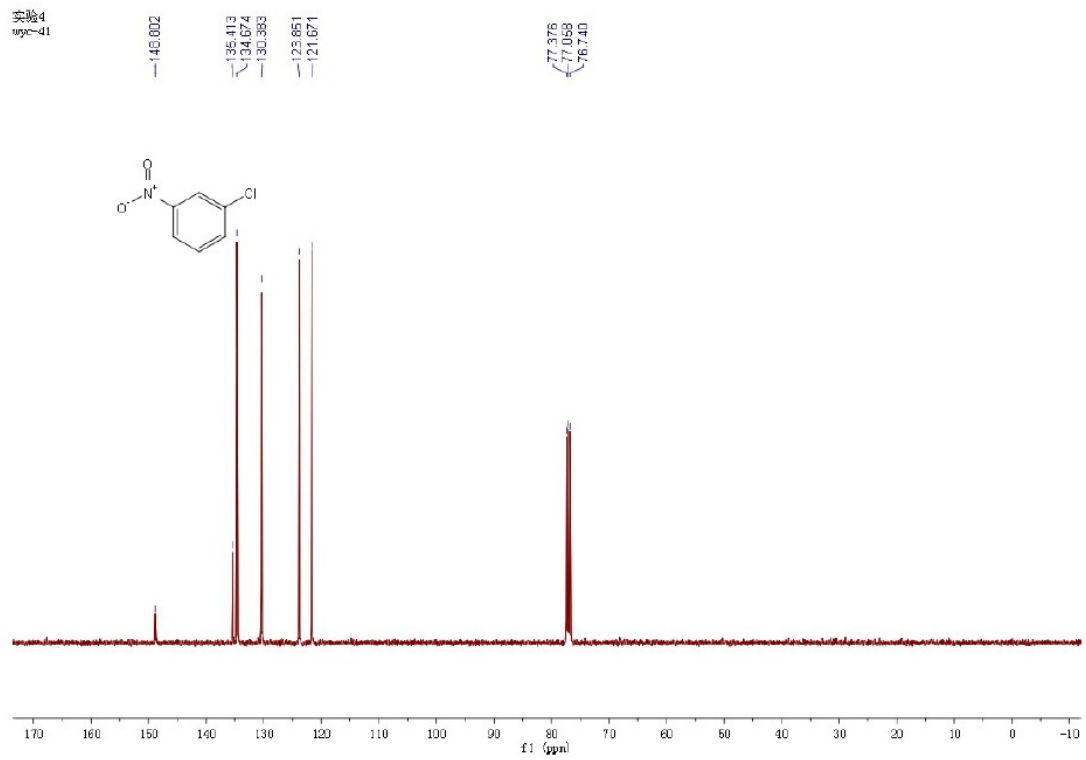

$^1\text{H}$  NMR and  $^{13}\text{C}$  NMR spectra of compound **2a**



H-1523

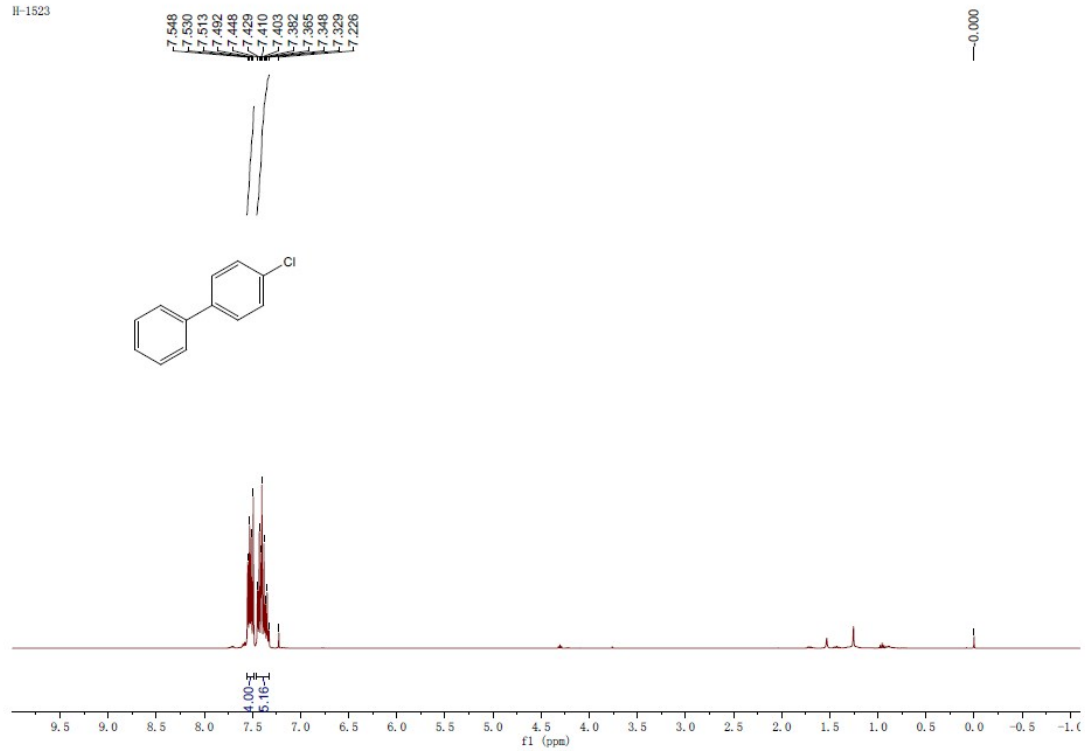

H-1523

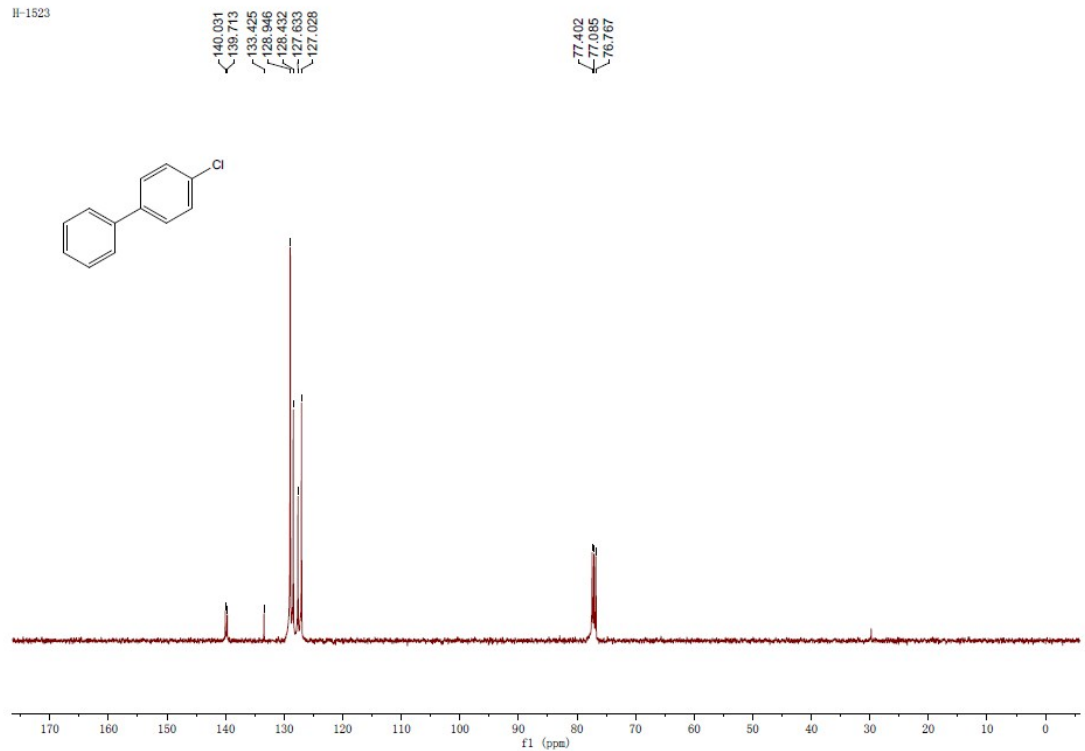

$^1\text{H}$  NMR and  $^{13}\text{C}$  NMR spectra of compound **2b**

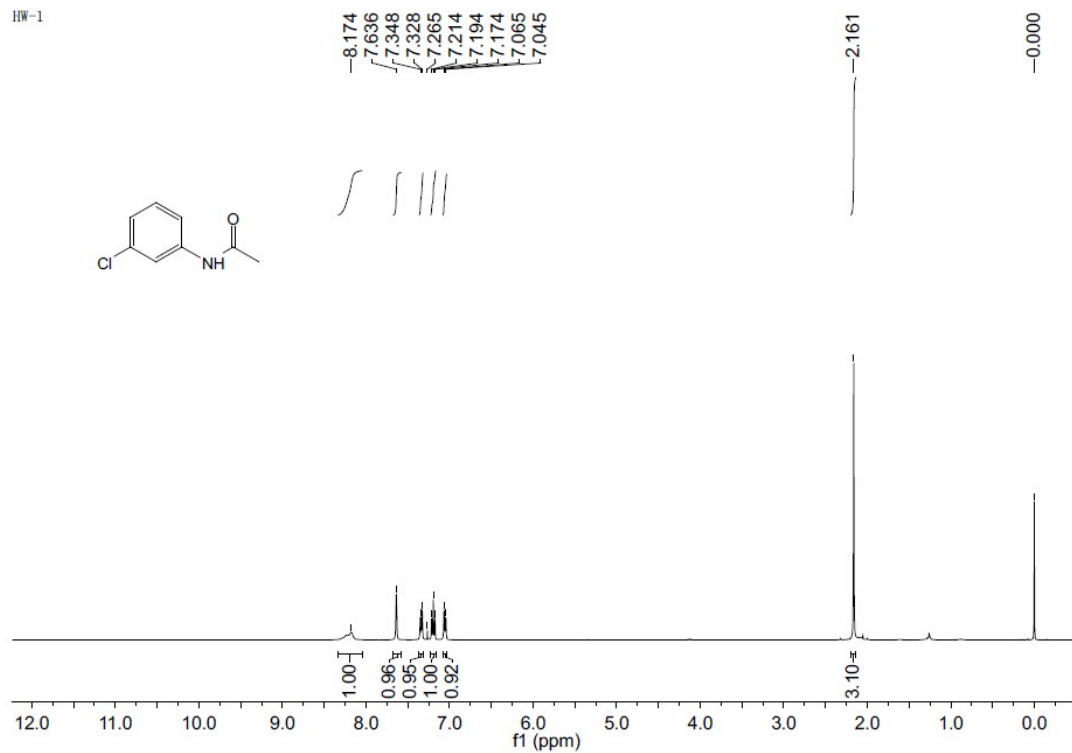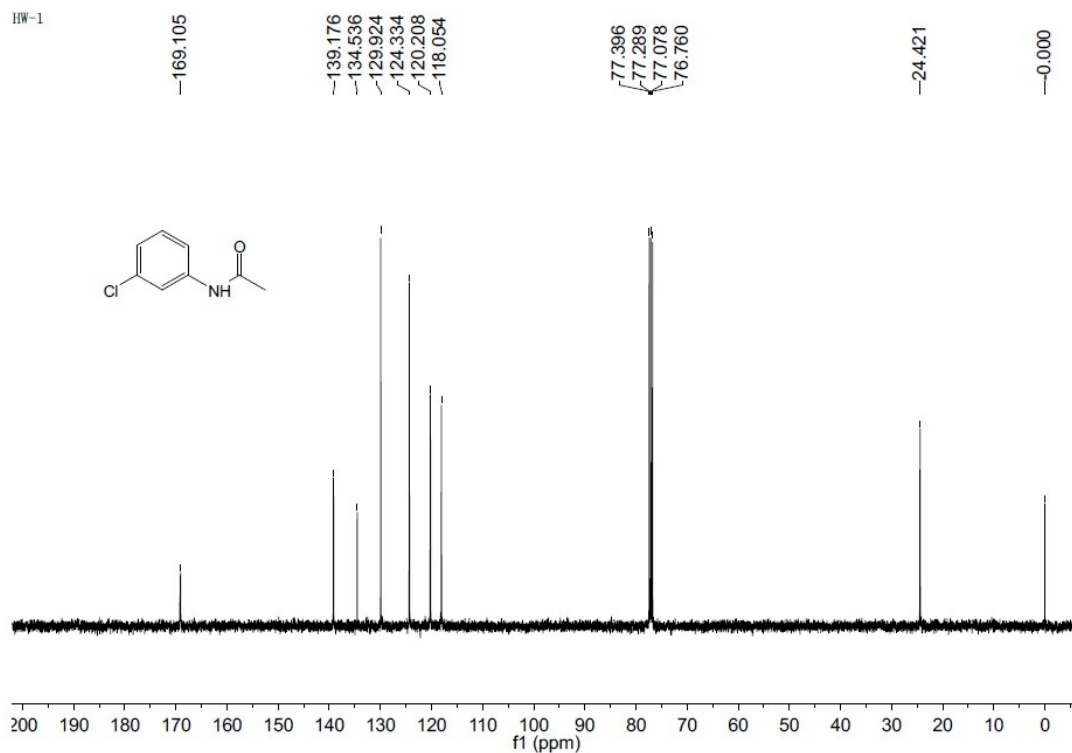

$^1\text{H}$  NMR and  $^{13}\text{C}$  NMR spectra of compound **2c**

H-1514

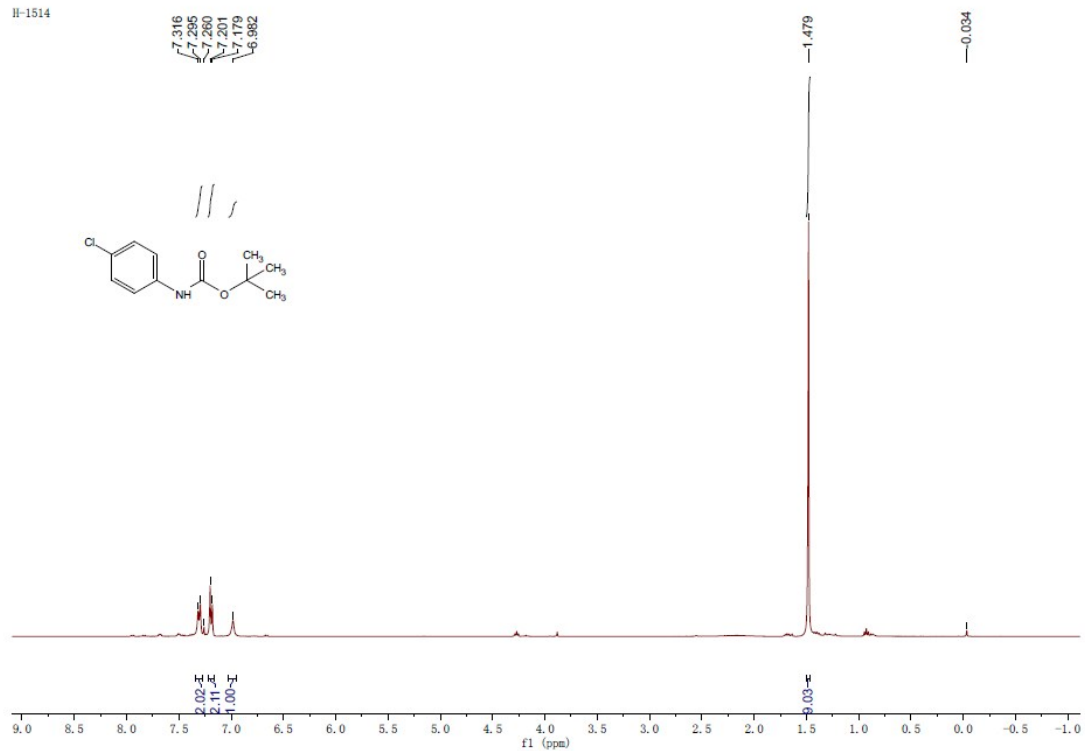

H-1614

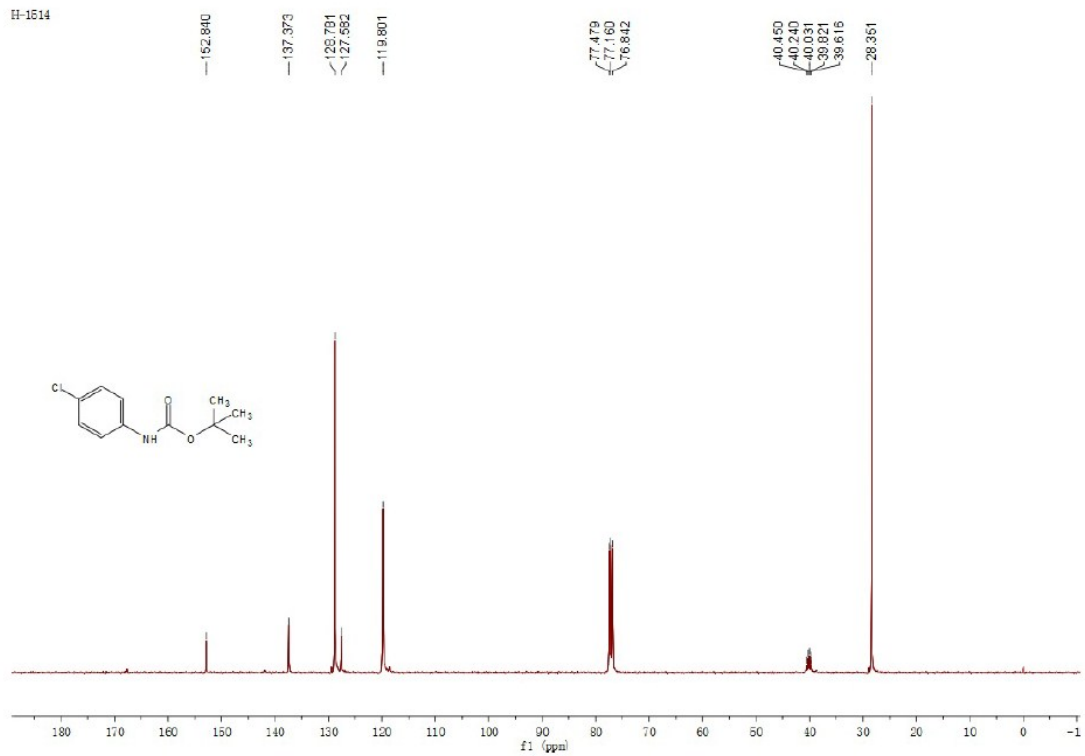

<sup>1</sup>H NMR and <sup>13</sup>C NMR spectra of compound **2d**

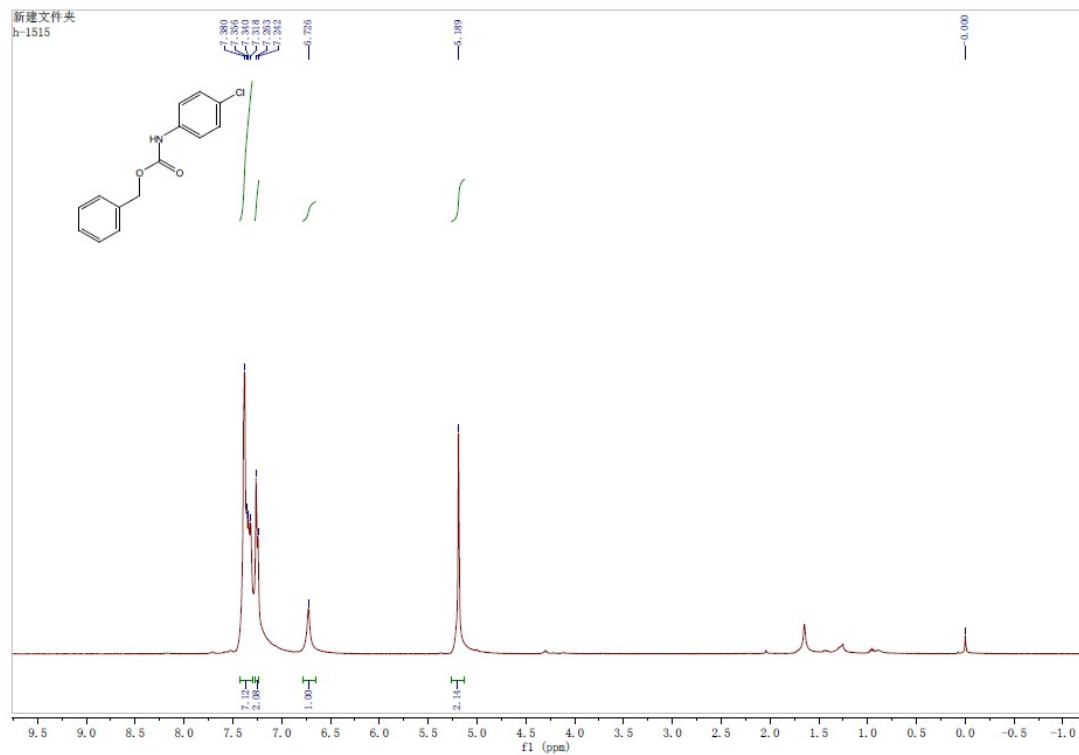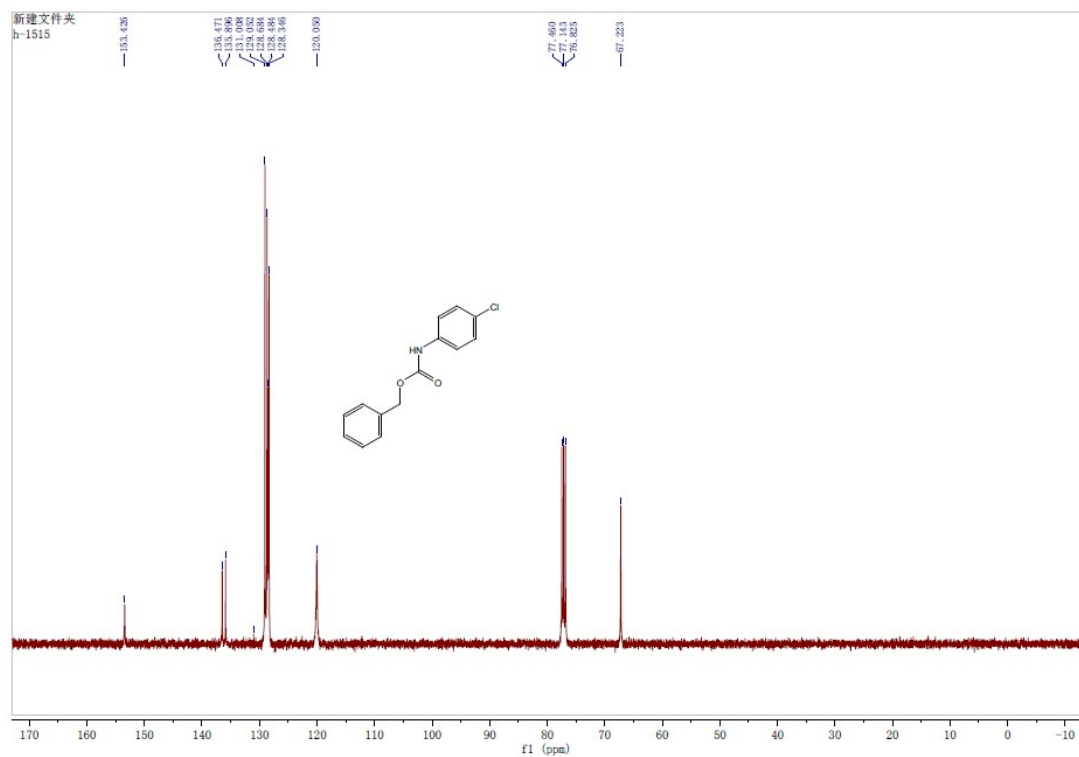

$^1\text{H}$  NMR and  $^{13}\text{C}$  NMR spectra of compound **2e**

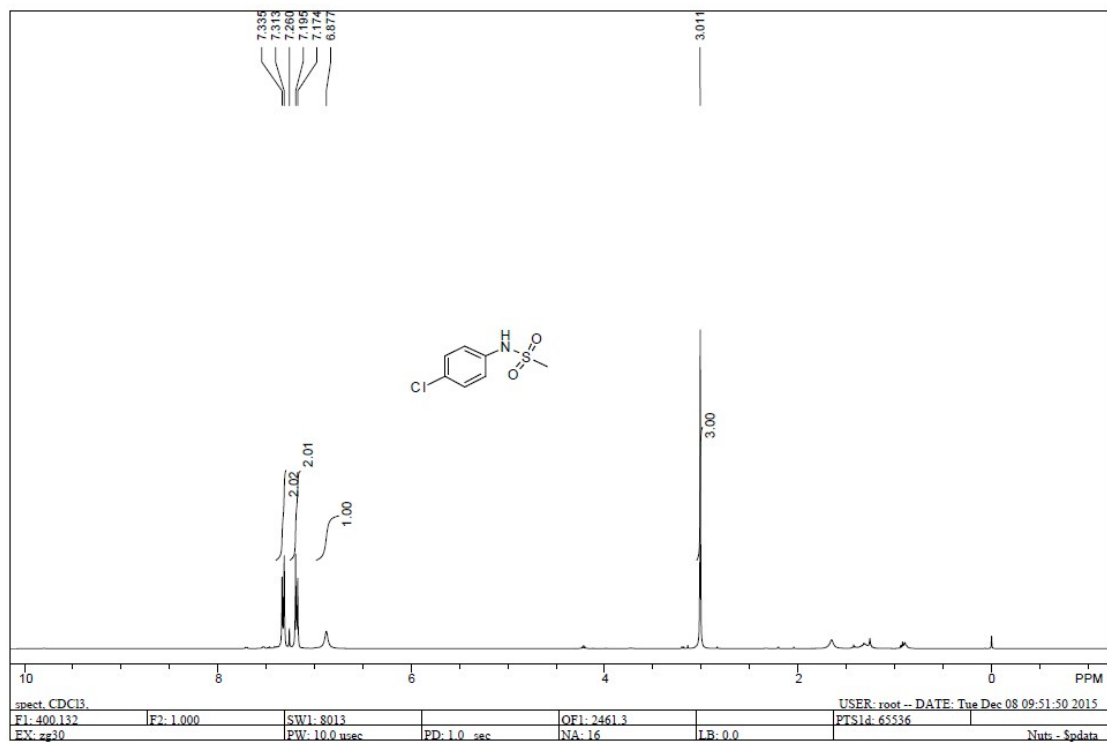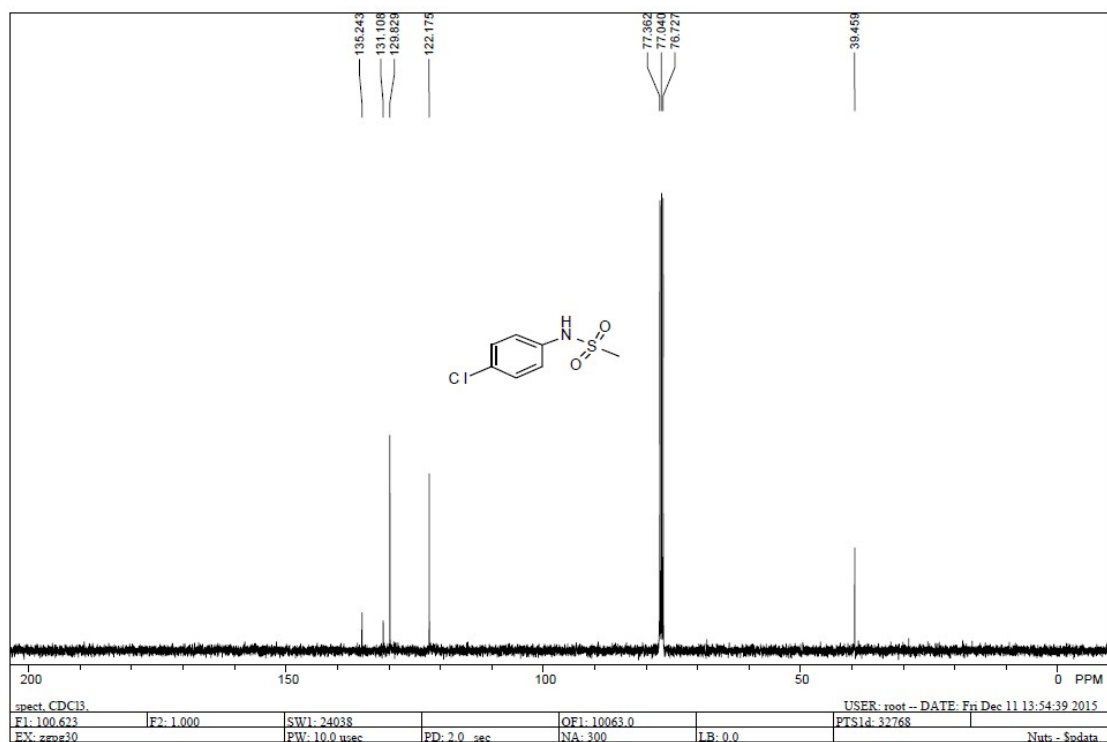

$^1\text{H}$  NMR and  $^{13}\text{C}$  NMR spectra of compound **2f**

hw-2-1

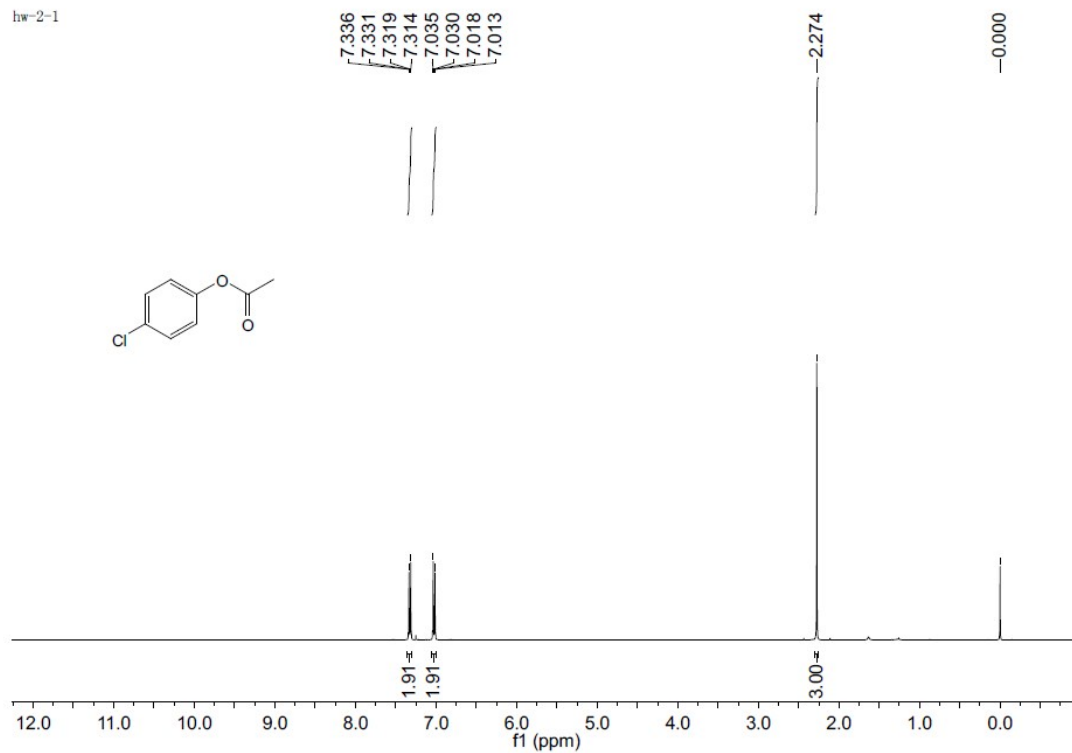

hw-2-2

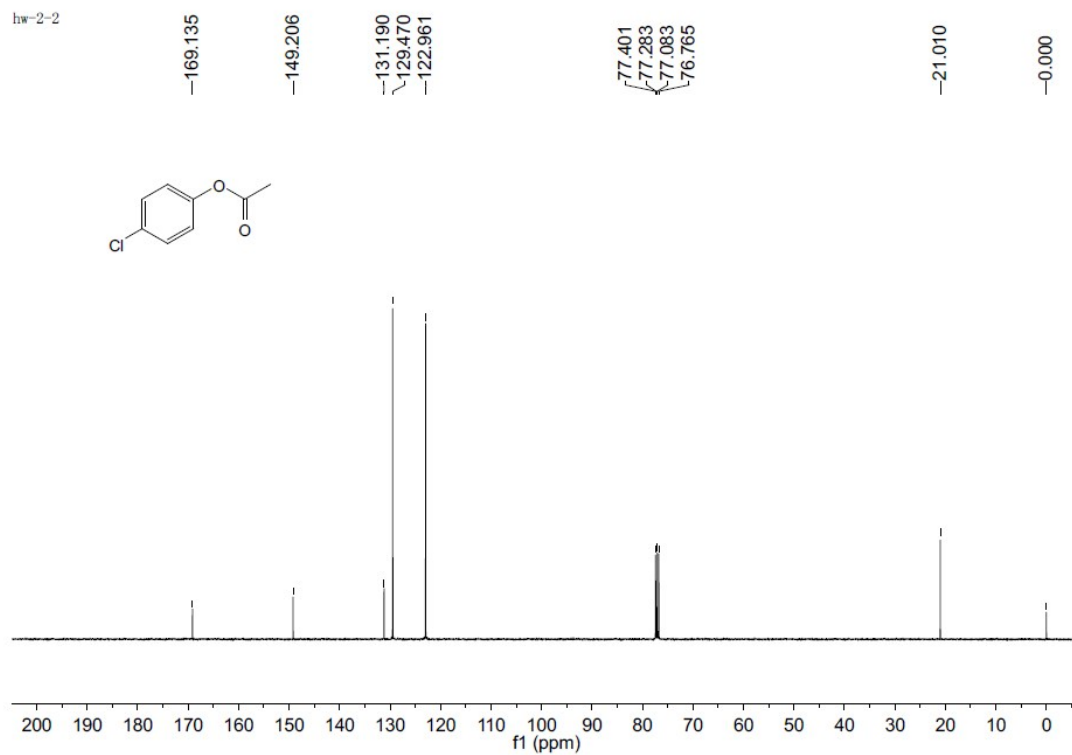

<sup>1</sup>H NMR and <sup>13</sup>C NMR spectra of compound **2g**

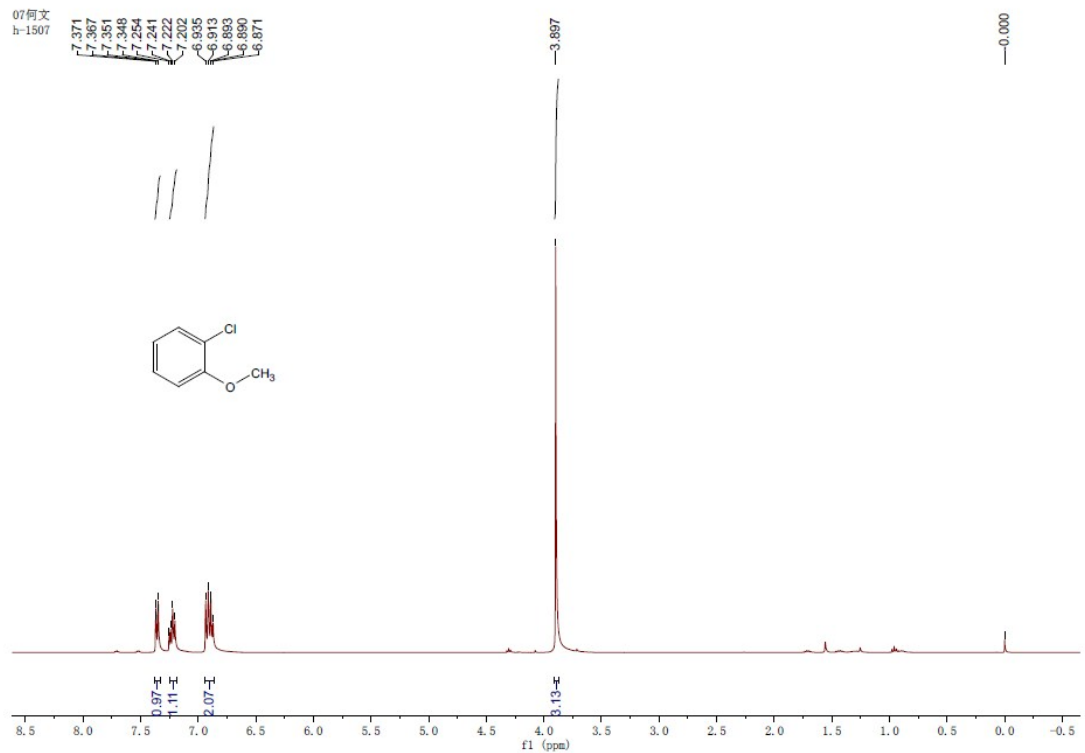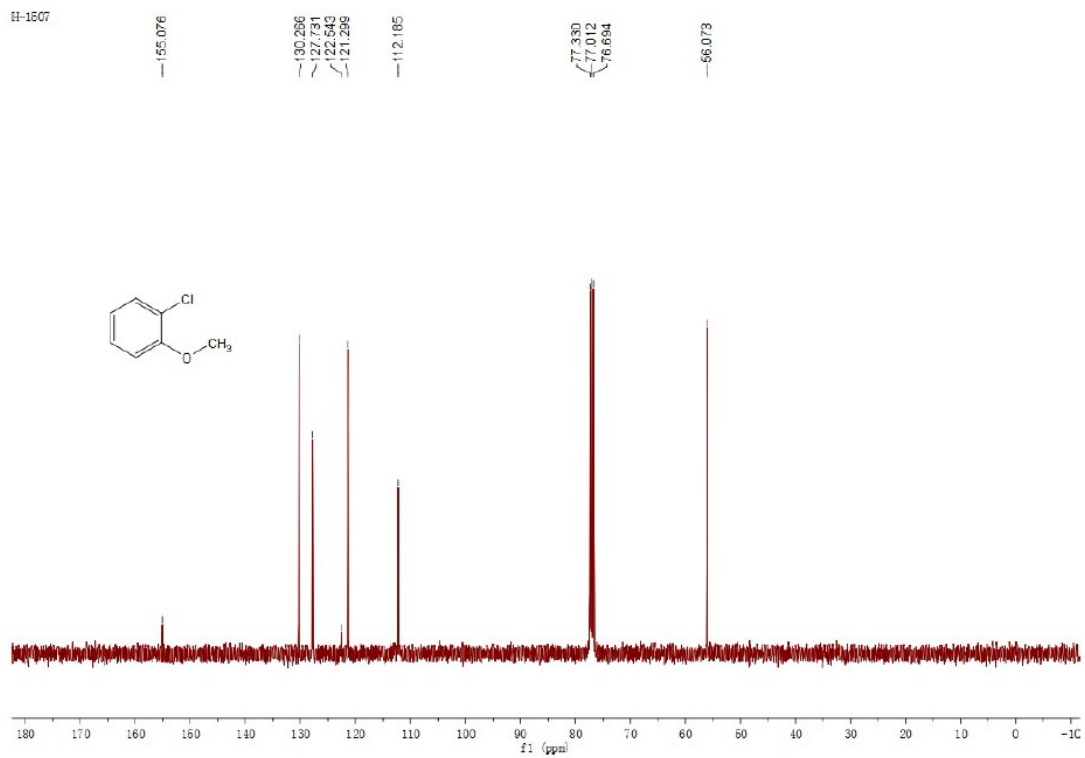

$^1\text{H}$  NMR and  $^{13}\text{C}$  NMR spectra of compound **2h**

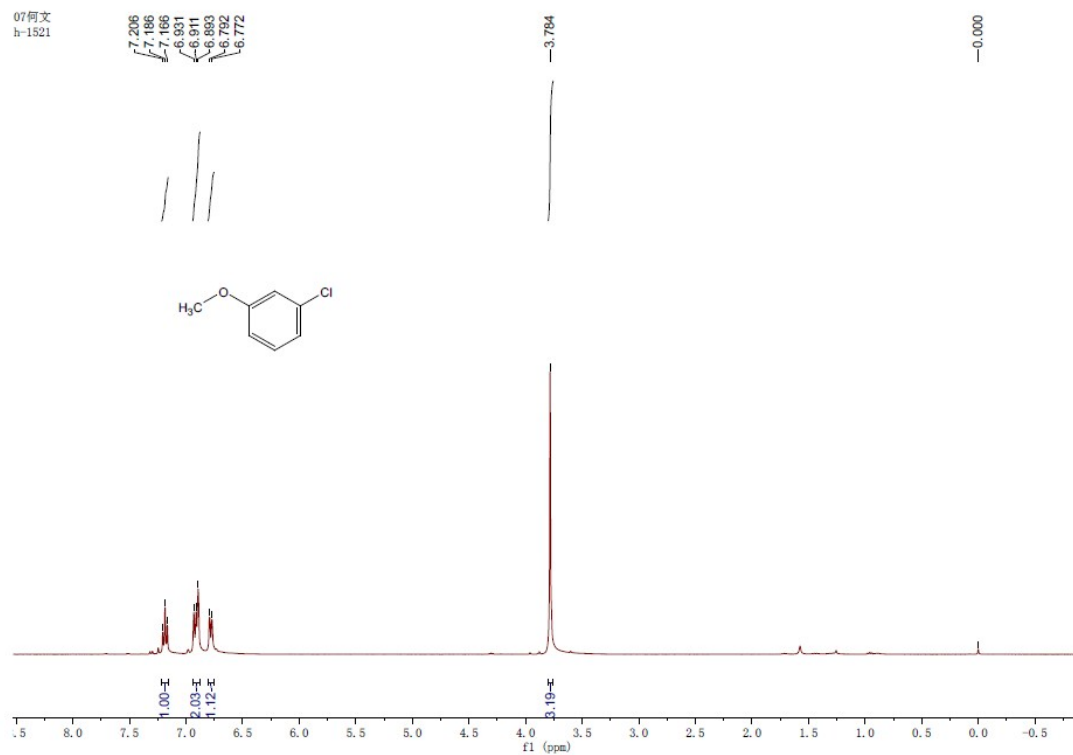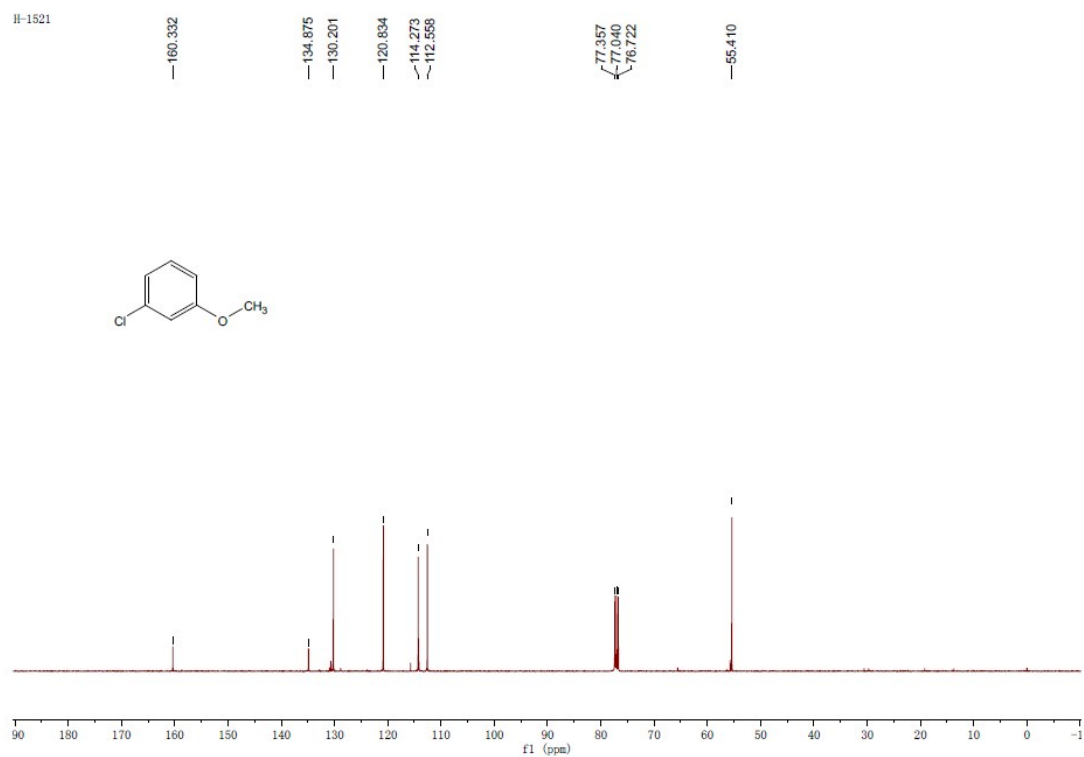

<sup>1</sup>H NMR and <sup>13</sup>C NMR spectra of compound **2i**



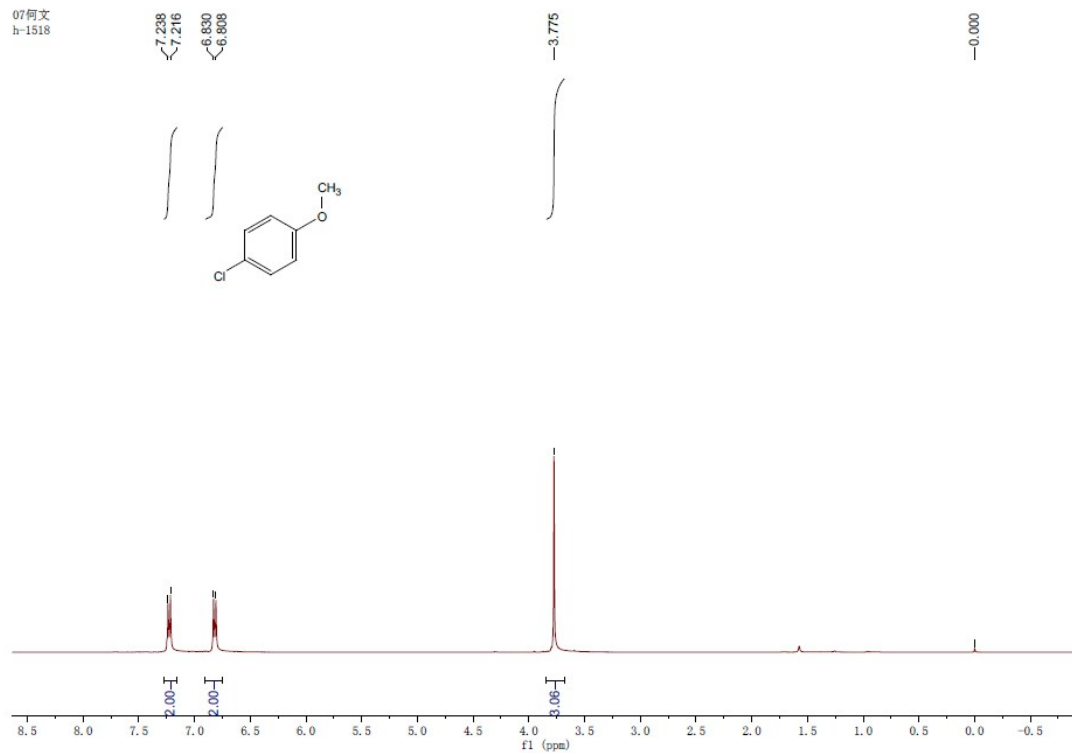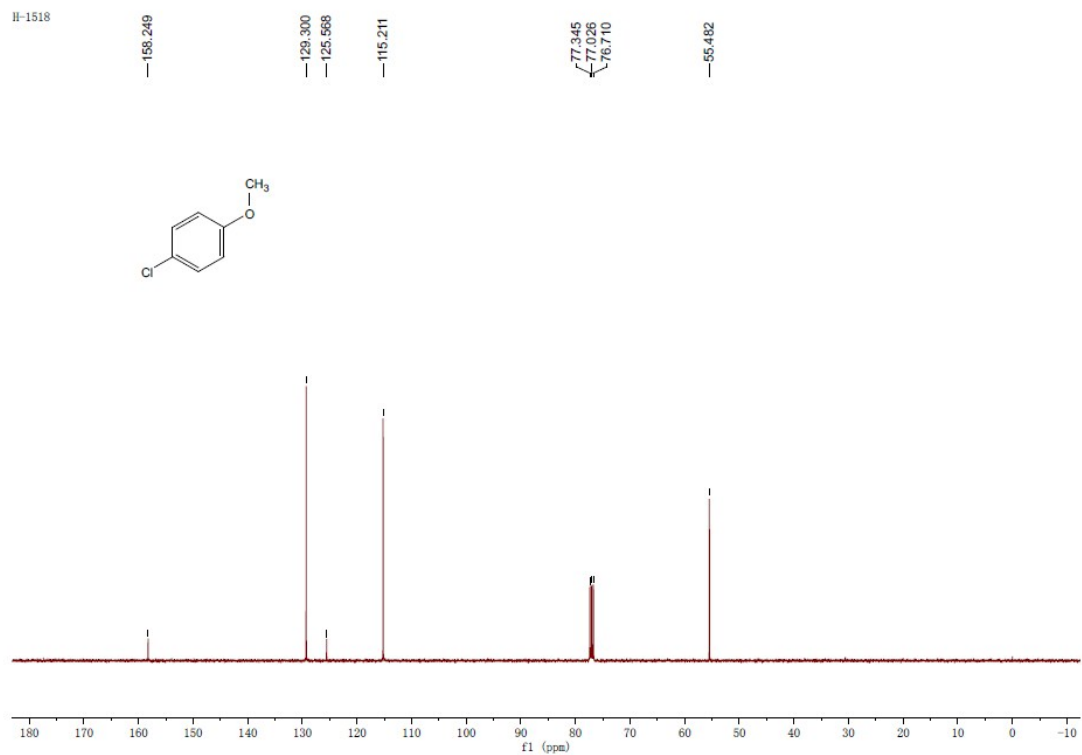

<sup>1</sup>H NMR and <sup>13</sup>C NMR spectra of compound **2j**

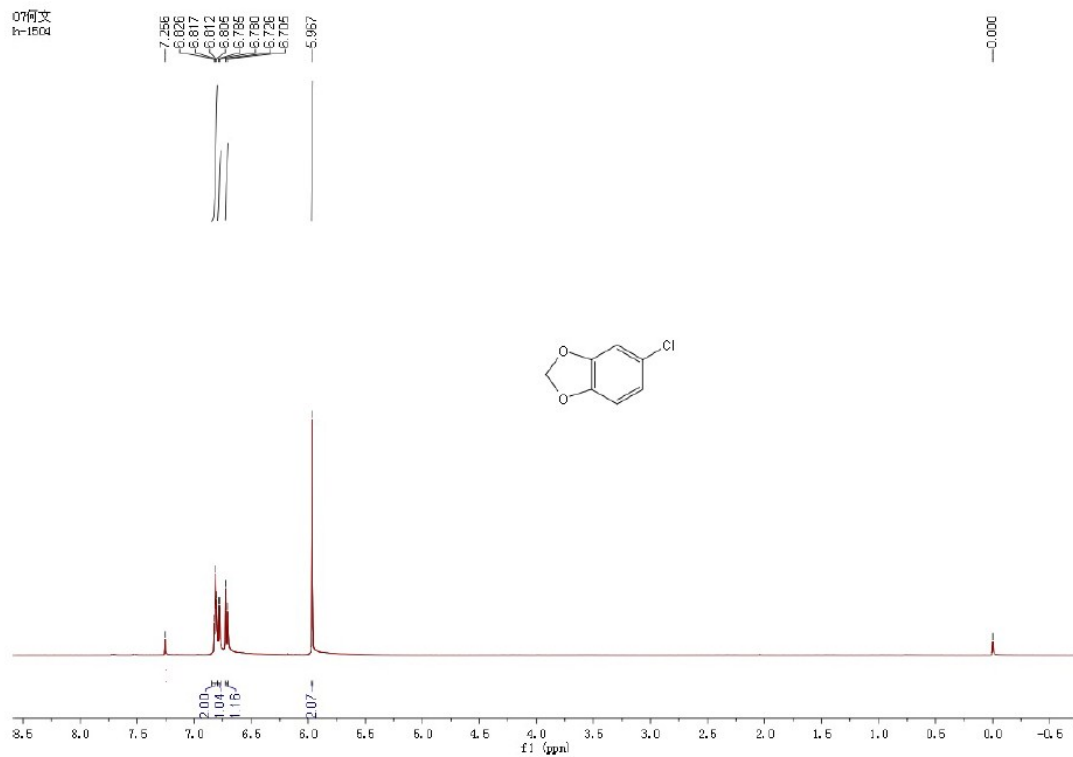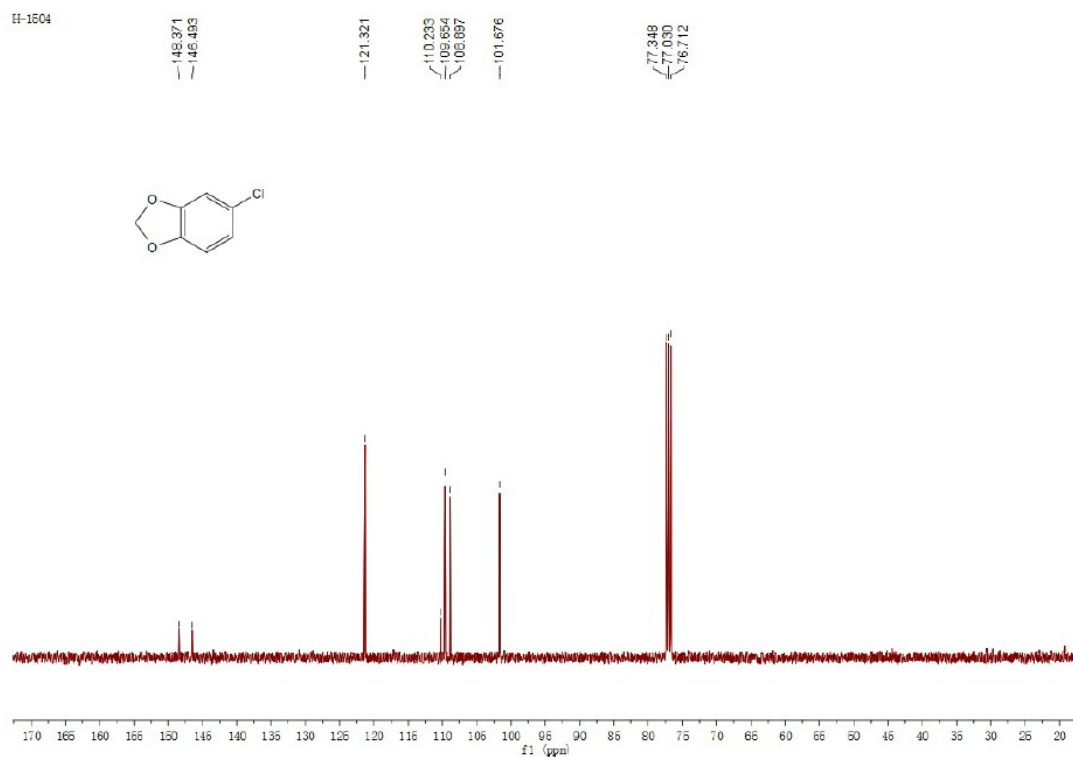

$^1\text{H}$  NMR and  $^{13}\text{C}$  NMR spectra of compound **2k**

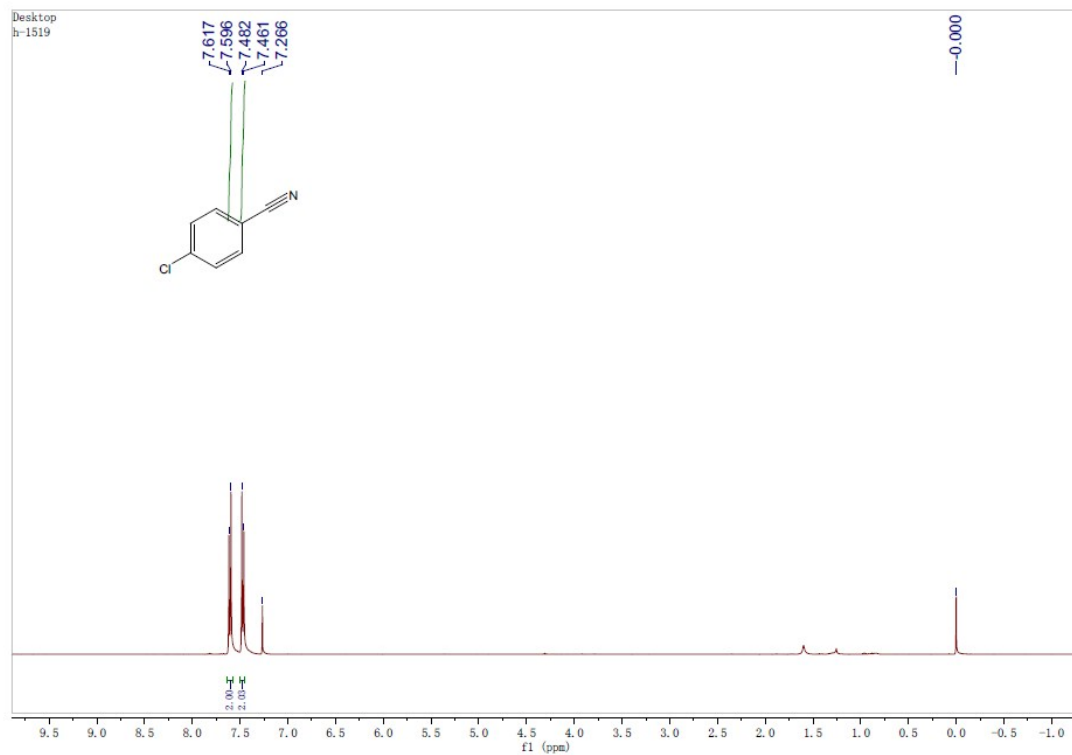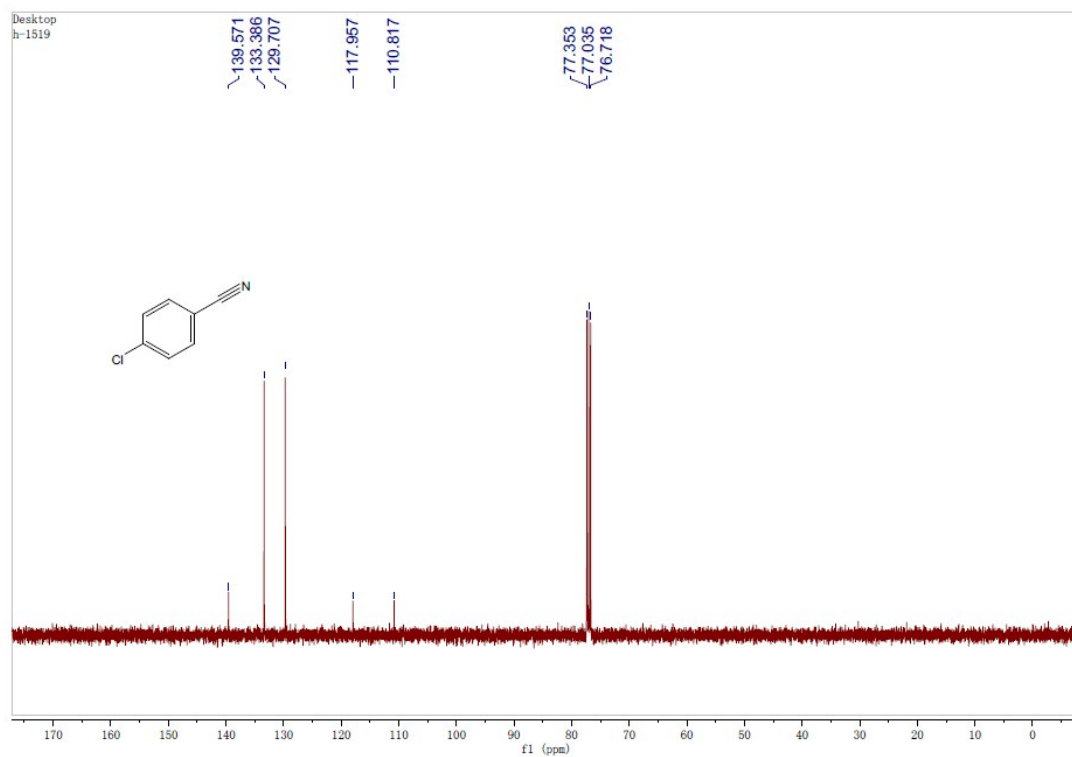

$^1\text{H}$  NMR and  $^{13}\text{C}$  NMR spectra of compound **21**

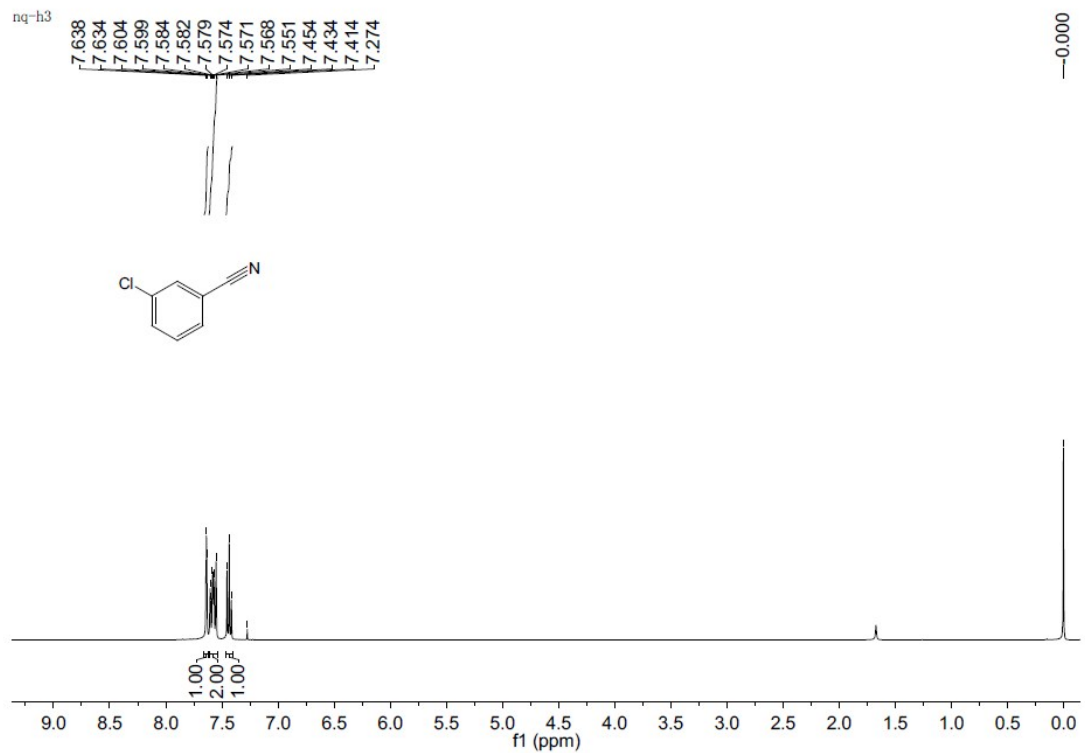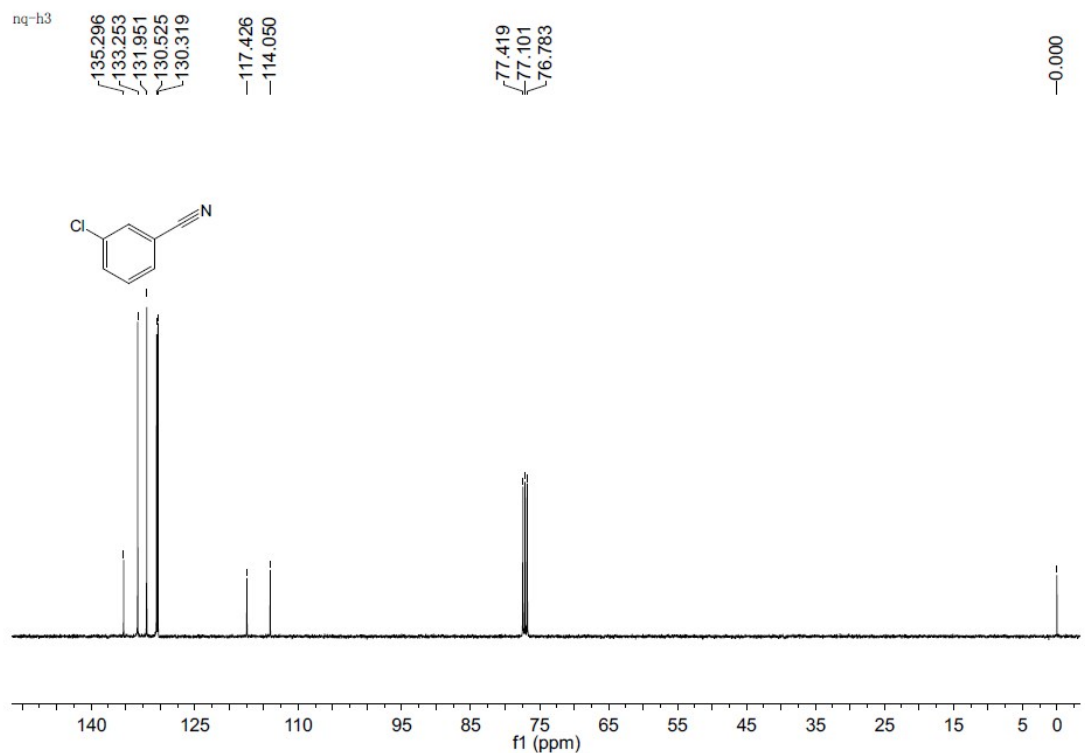

$^1\text{H}$  NMR and  $^{13}\text{C}$  NMR spectra of compound **2m**

Desktop  
h-1524

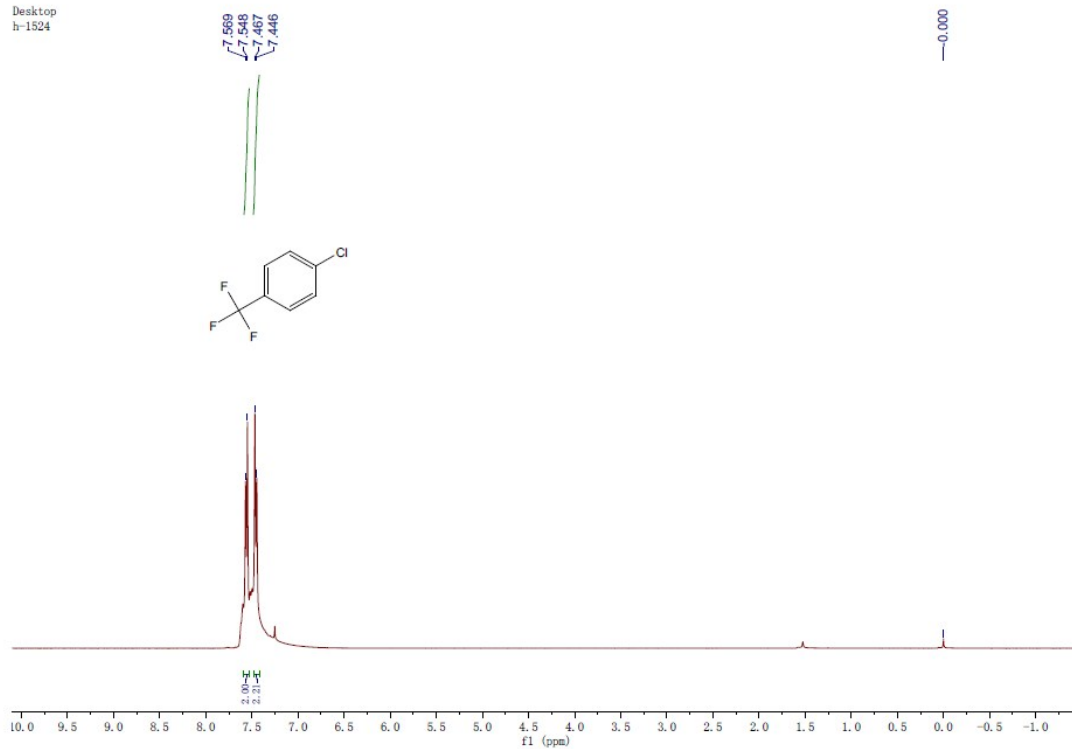

实验3  
h-1524

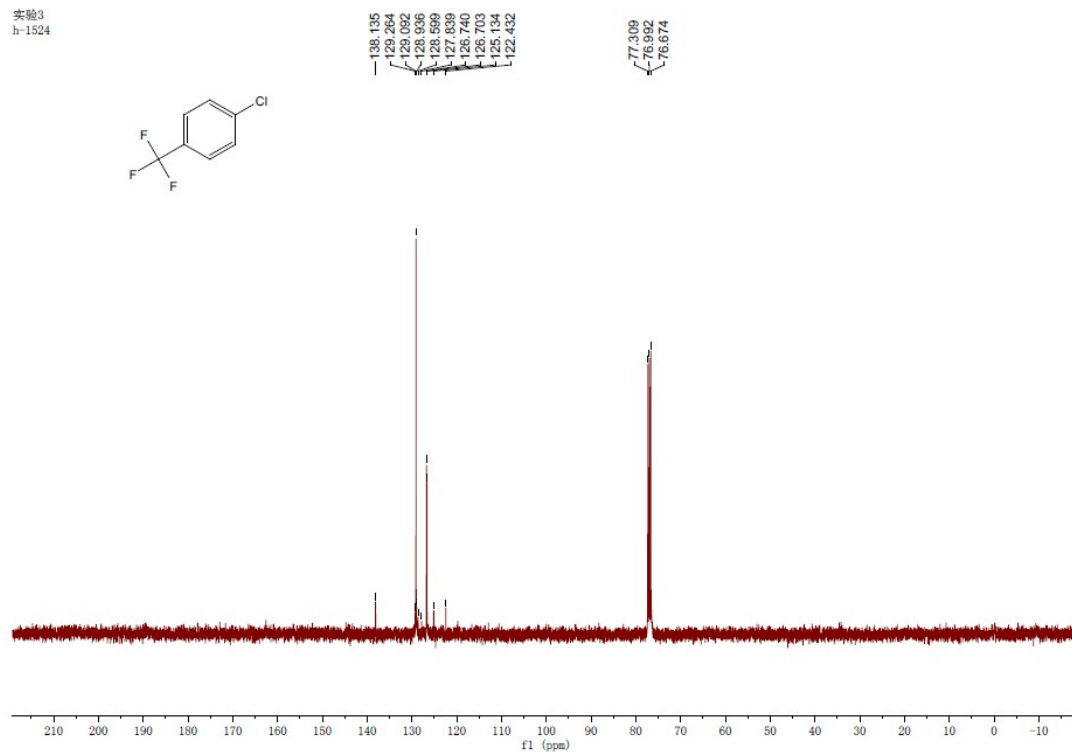

<sup>1</sup>H NMR and <sup>13</sup>C NMR spectra of compound **2n**

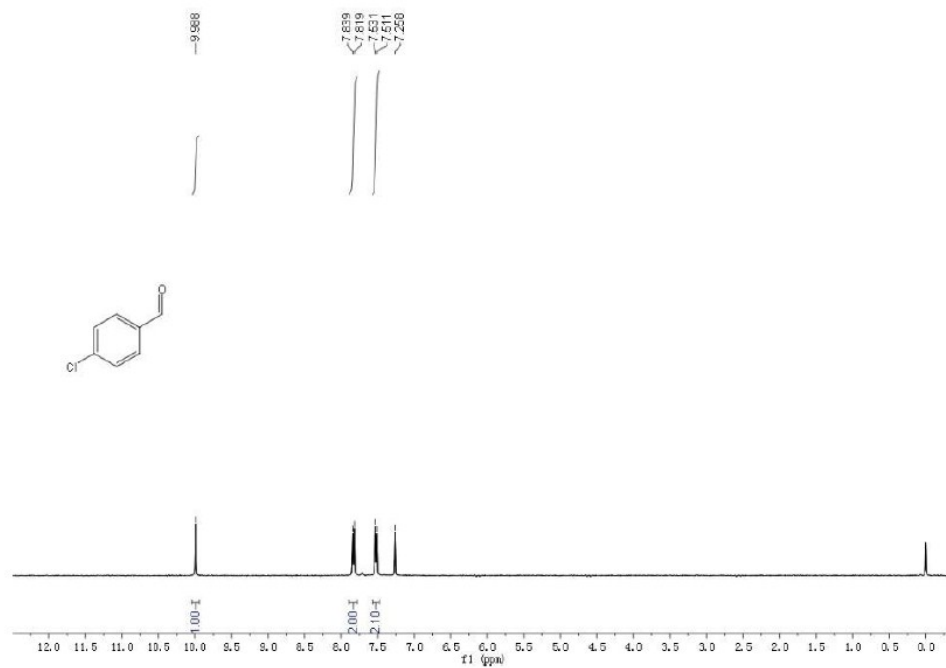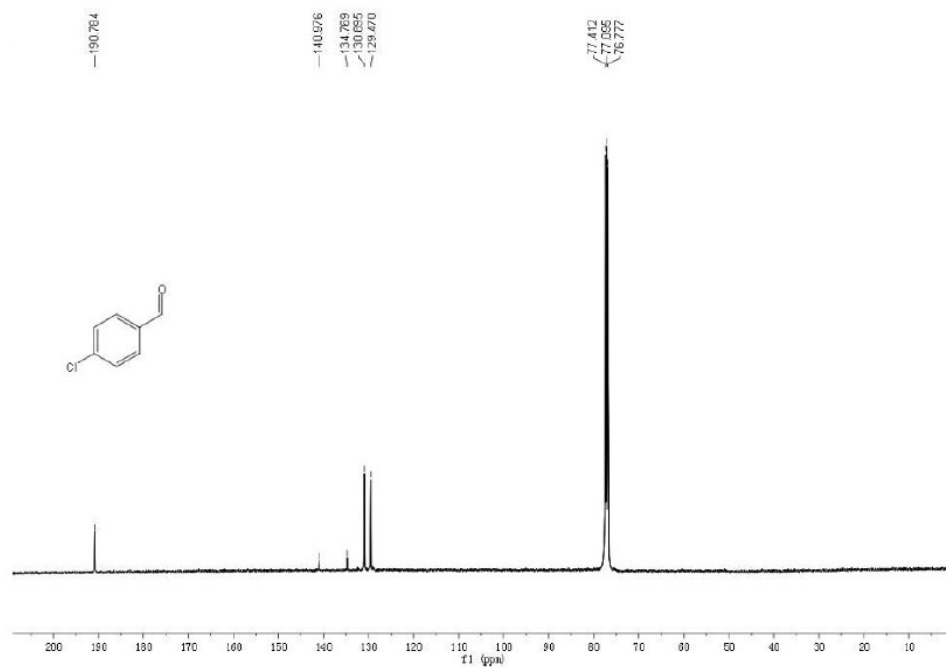

<sup>1</sup>H NMR and <sup>13</sup>C NMR spectra of compound **2o**

07何文  
H-1501

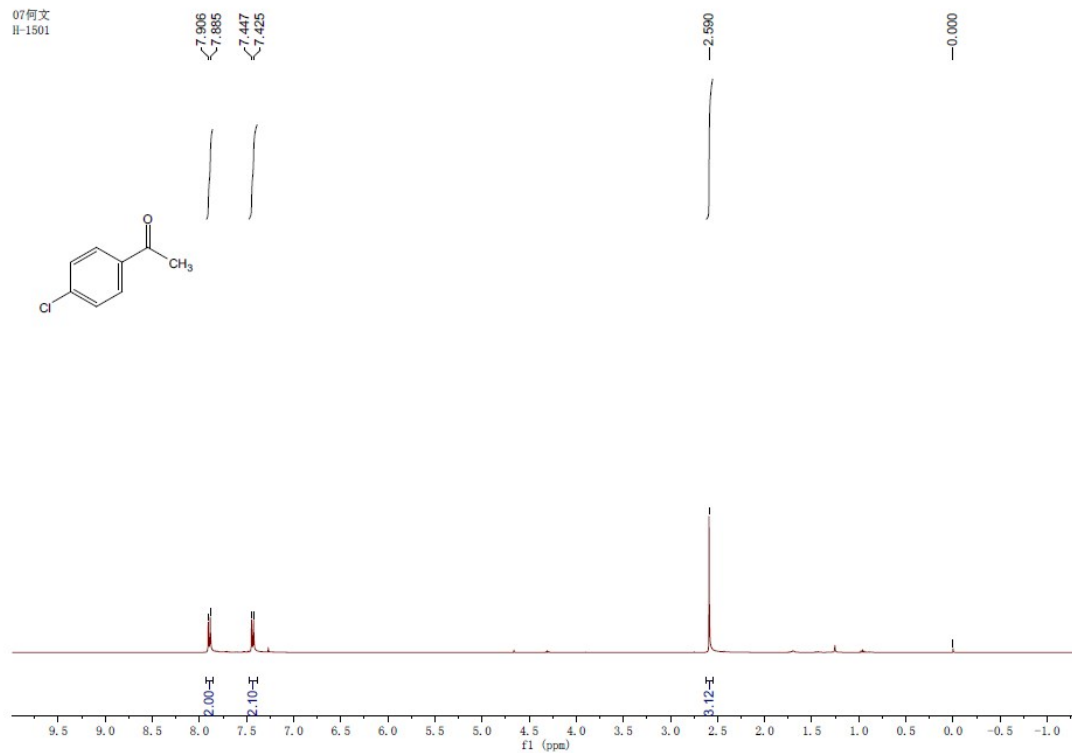

H-1601

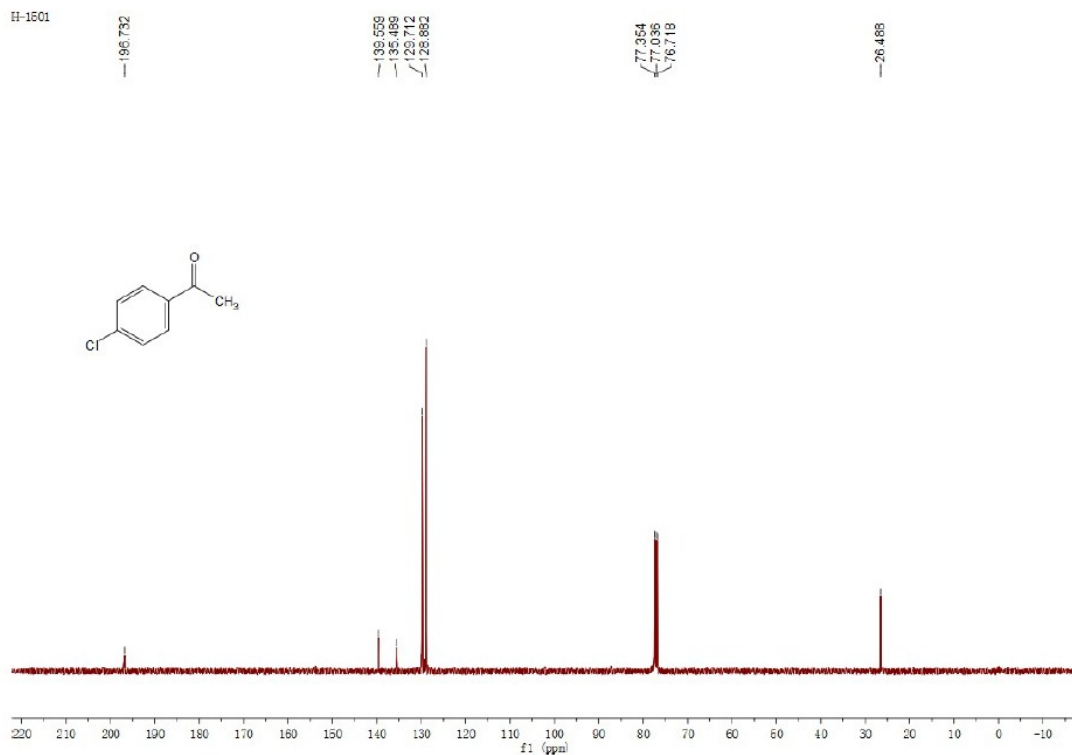

<sup>1</sup>H NMR and <sup>13</sup>C NMR spectra of compound **2p**

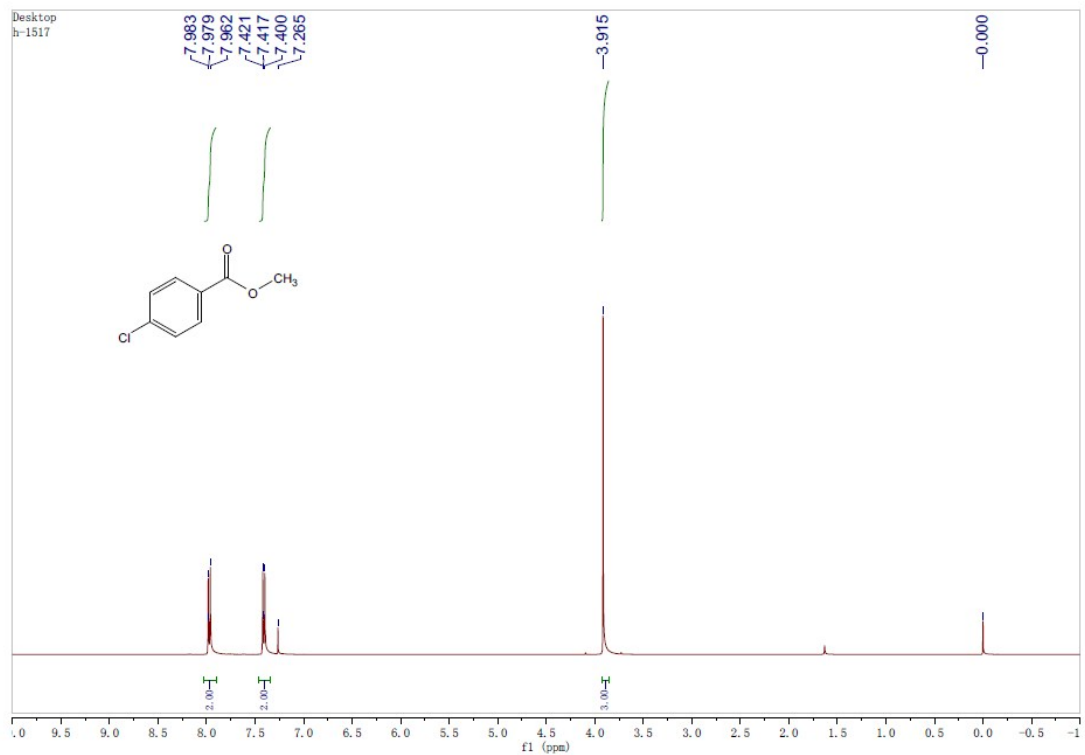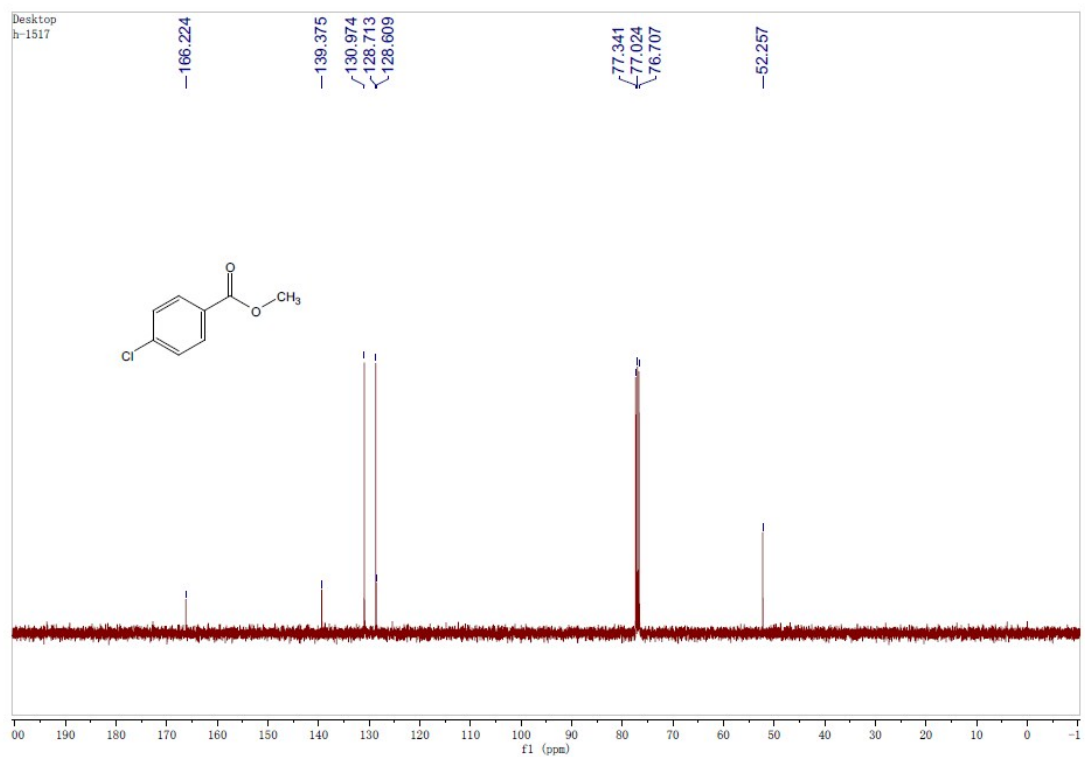

$^1\text{H}$  NMR and  $^{13}\text{C}$  NMR spectra of compound **2q**



07何文  
H-1513

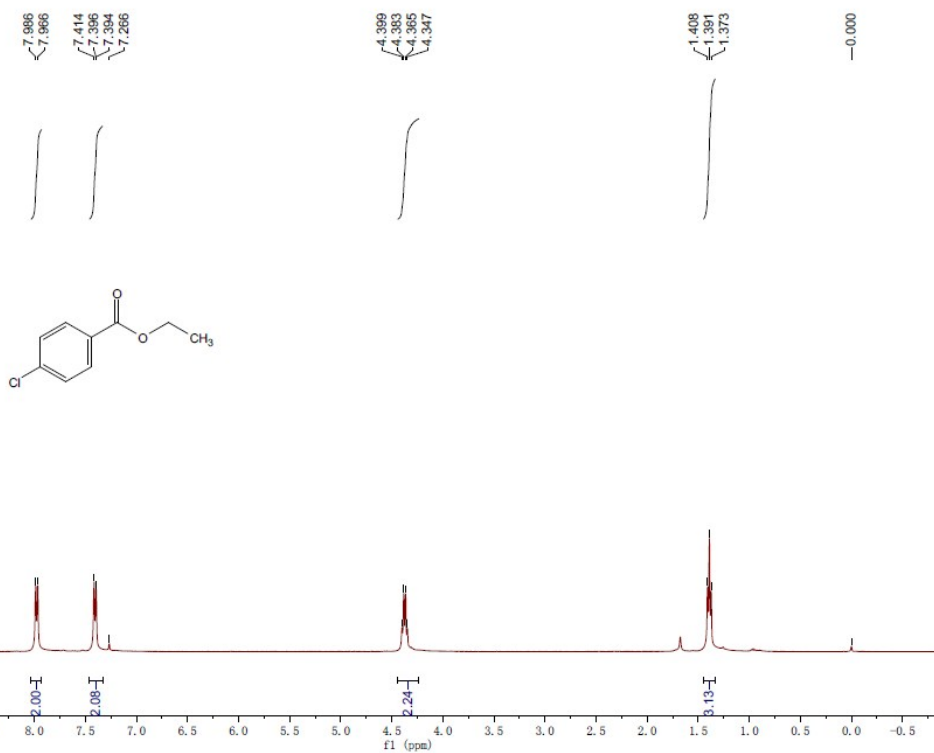

H-1513

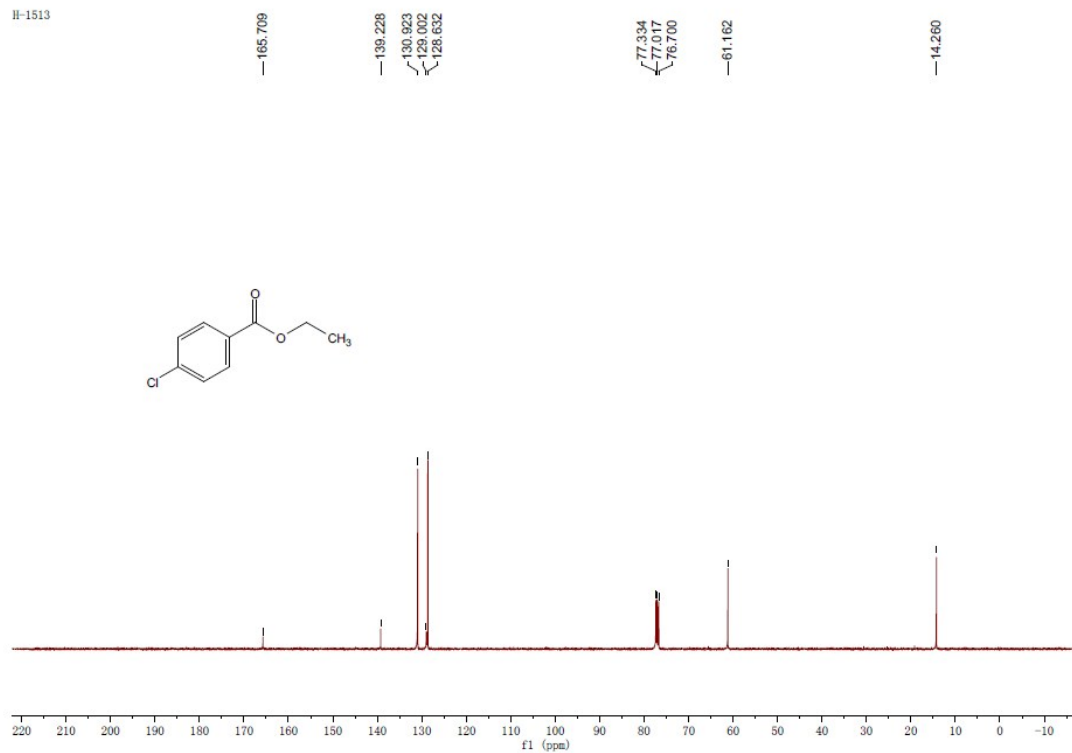

<sup>1</sup>H NMR and <sup>13</sup>C NMR spectra of compound 2r

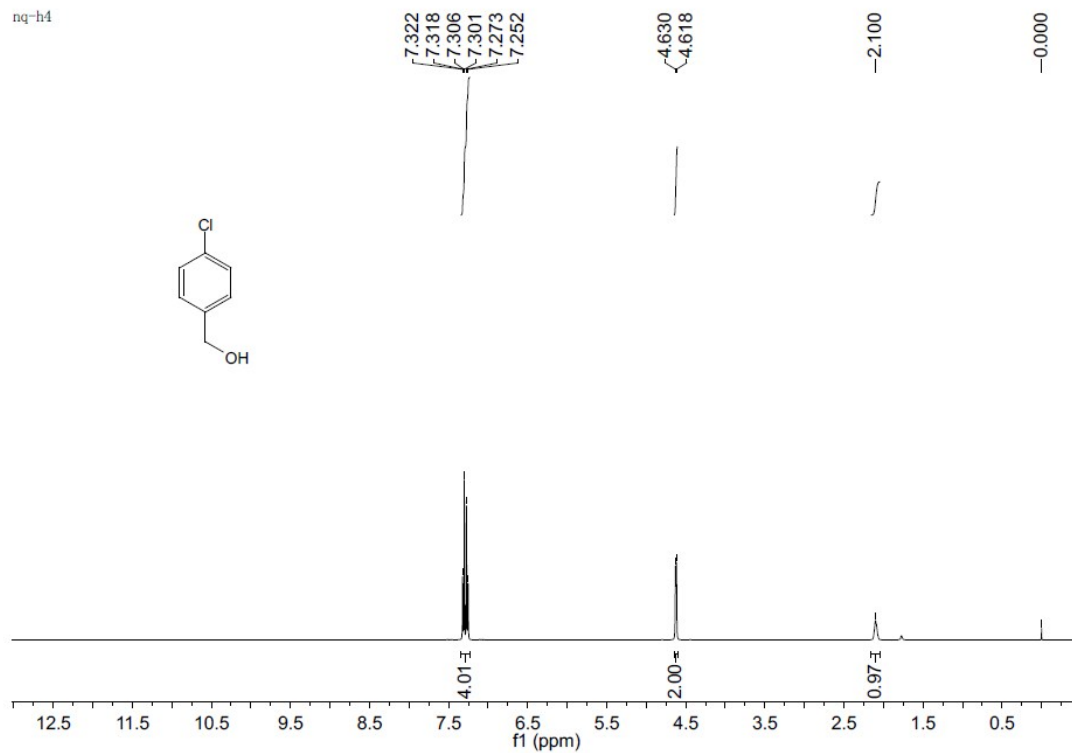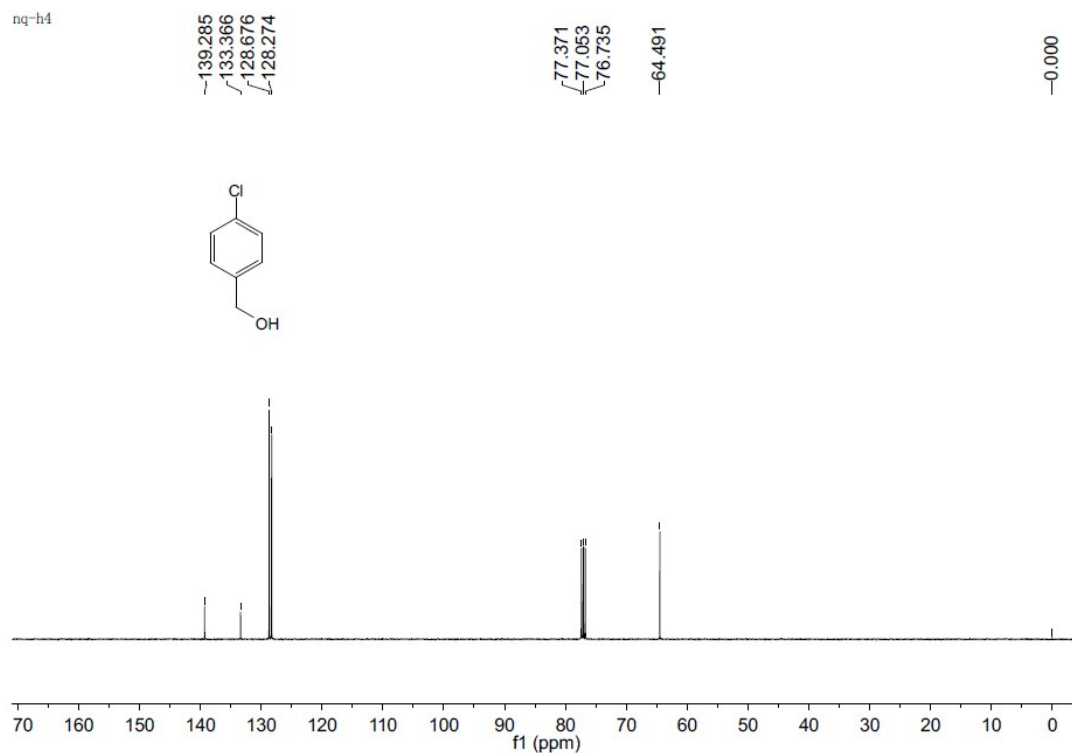

$^1\text{H}$  NMR and  $^{13}\text{C}$  NMR spectra of compound **2s**

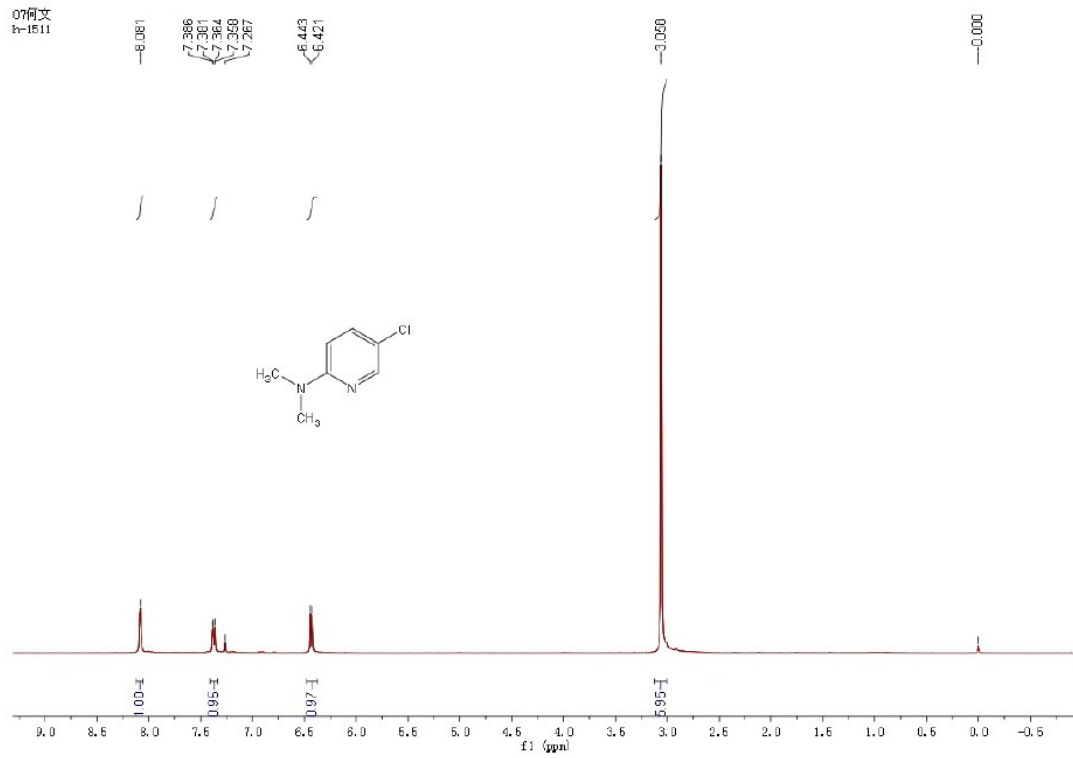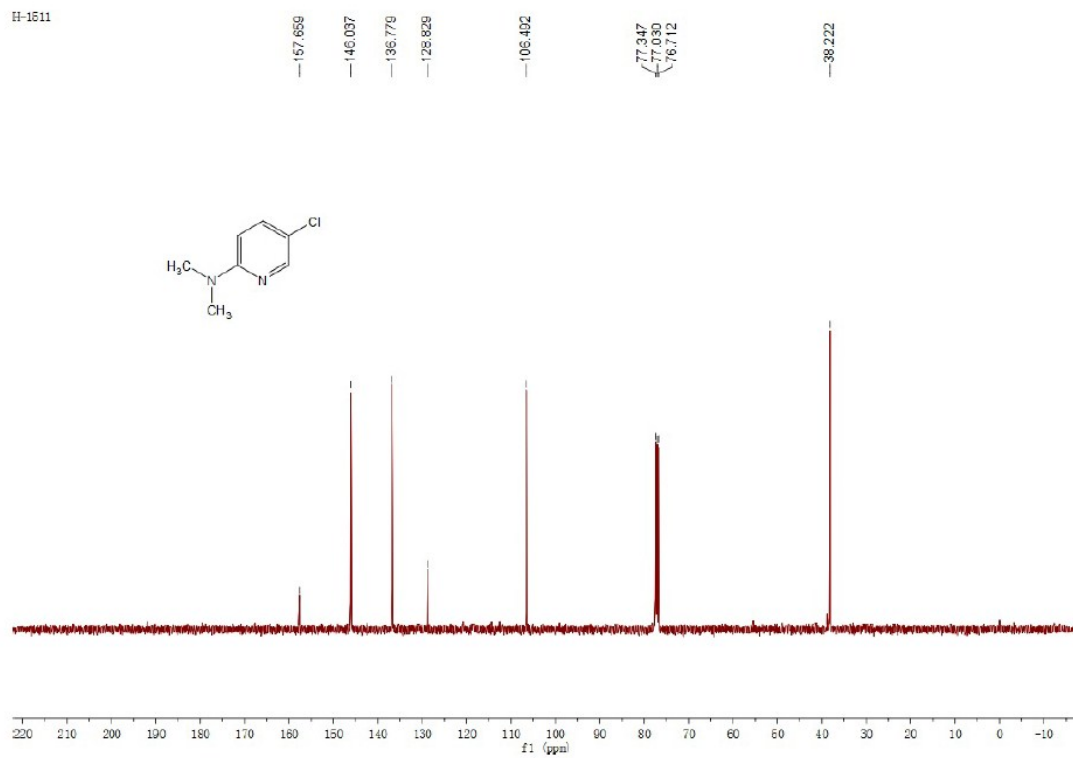

$^1\text{H}$  NMR and  $^{13}\text{C}$  NMR spectra of compound **2t**

07何文  
H-1520

8.273  
8.252  
7.842  
7.822  
7.749  
7.729  
7.595  
7.578  
7.544  
7.537  
7.516  
7.498  
7.376  
7.356  
7.337  
7.220

0.000

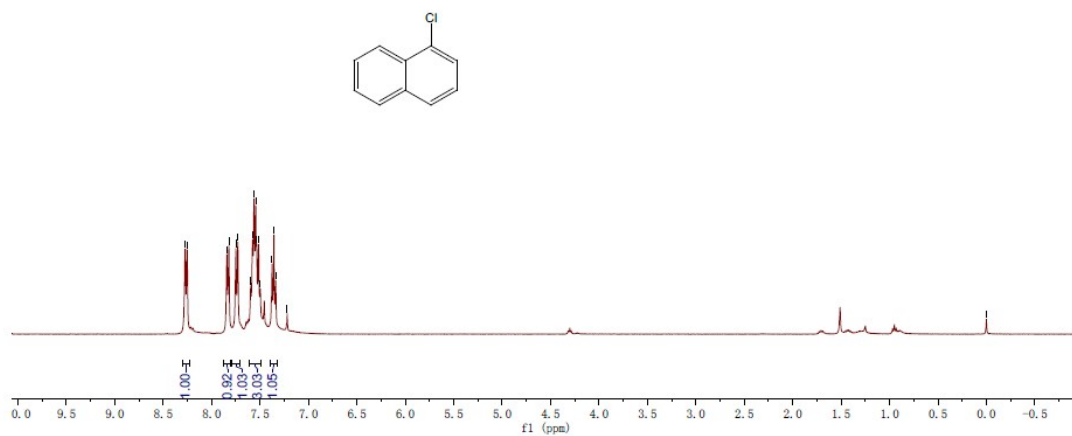

H-1520

134.623  
131.982  
130.877  
128.236  
127.178  
127.052  
126.698  
126.176  
125.724  
124.444

77.372  
77.054  
76.738

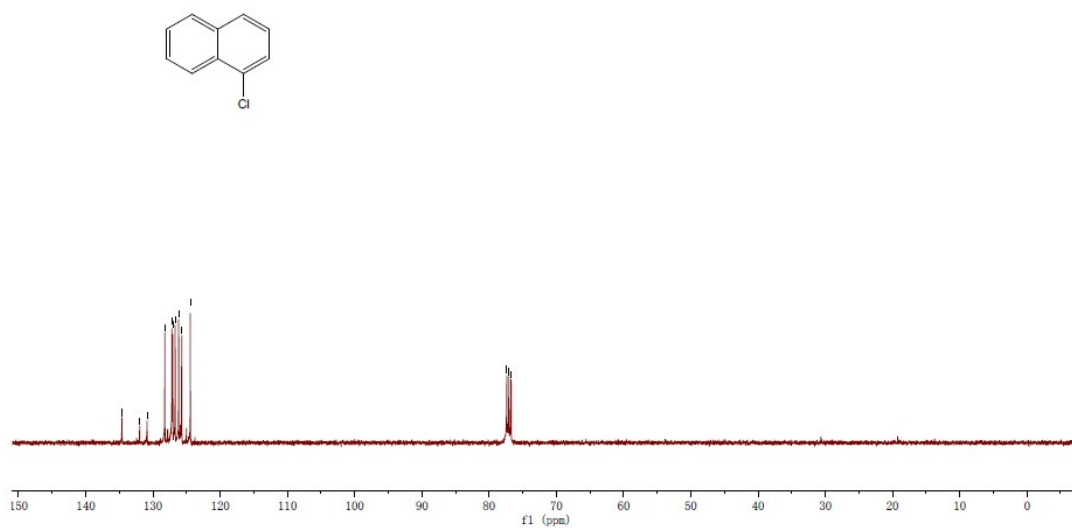

<sup>1</sup>H NMR and <sup>13</sup>C NMR spectra of compound **2u**

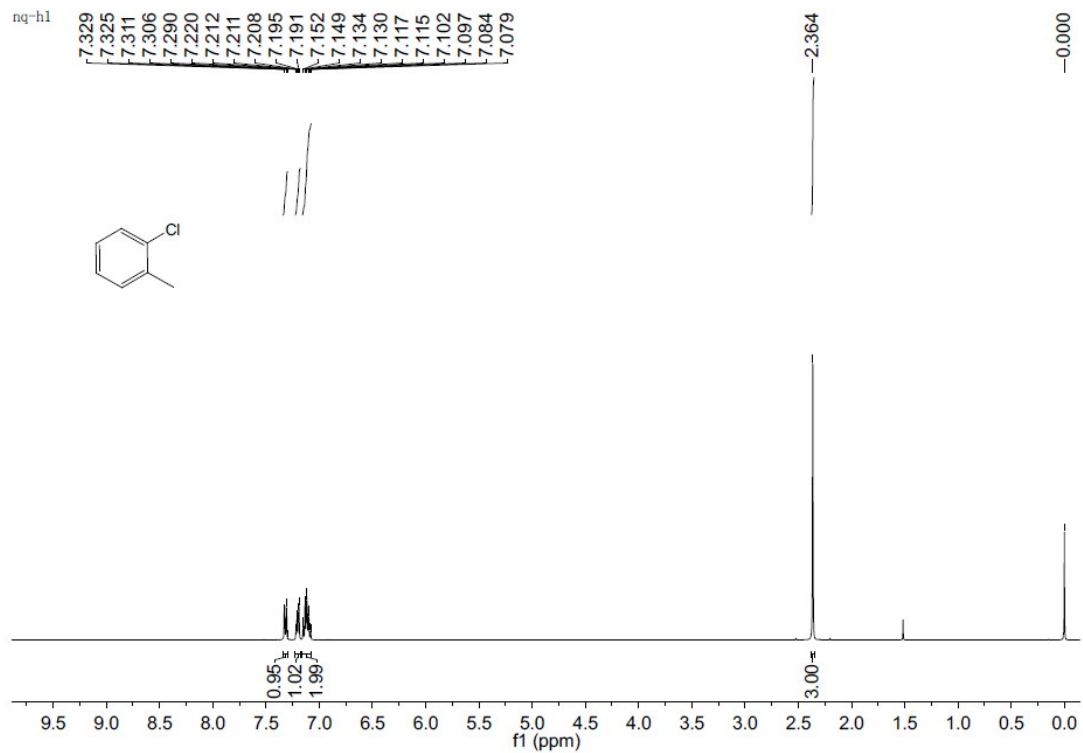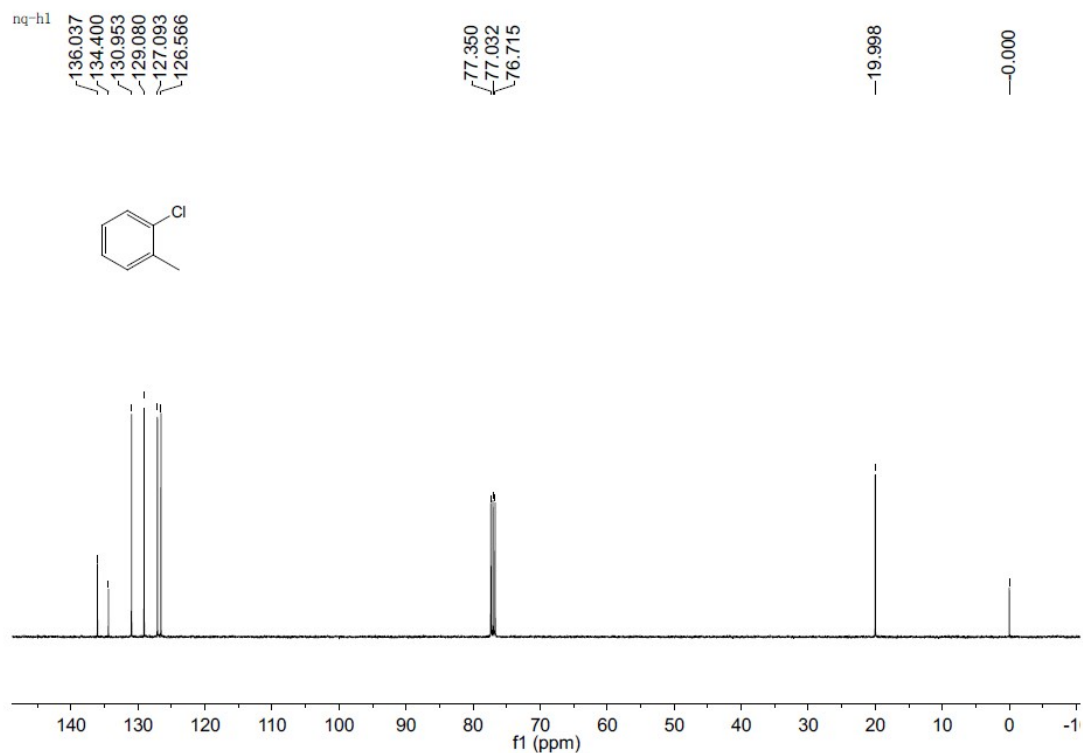

$^1\text{H}$  NMR and  $^{13}\text{C}$  NMR spectra of compound **2v**

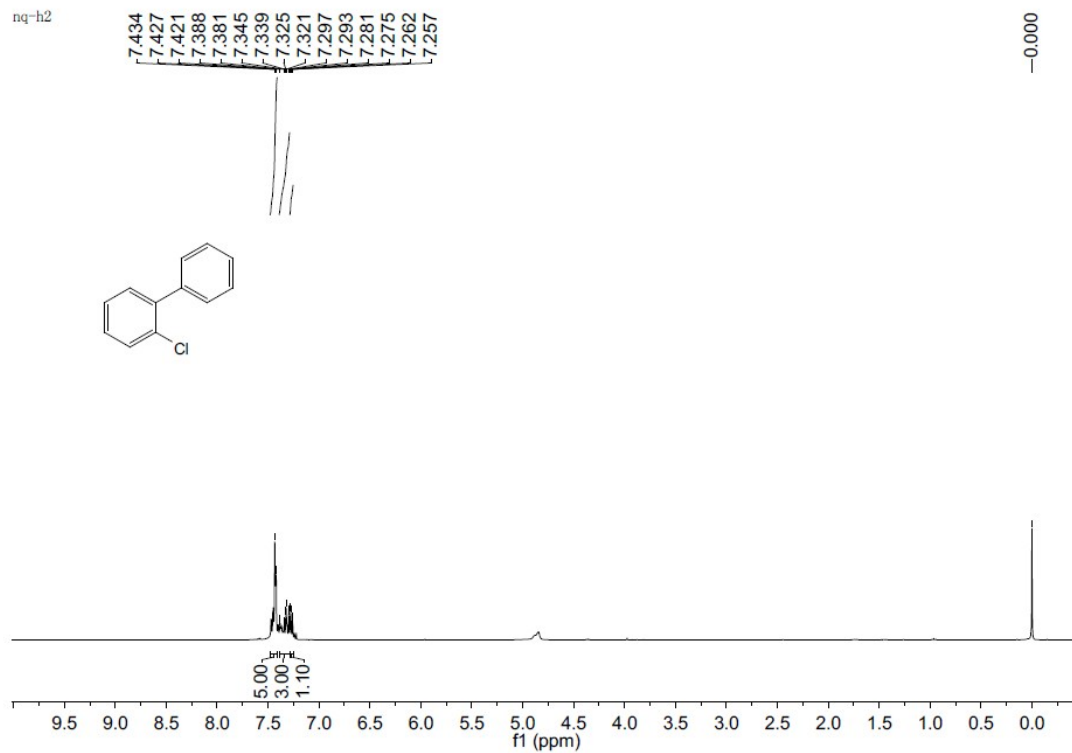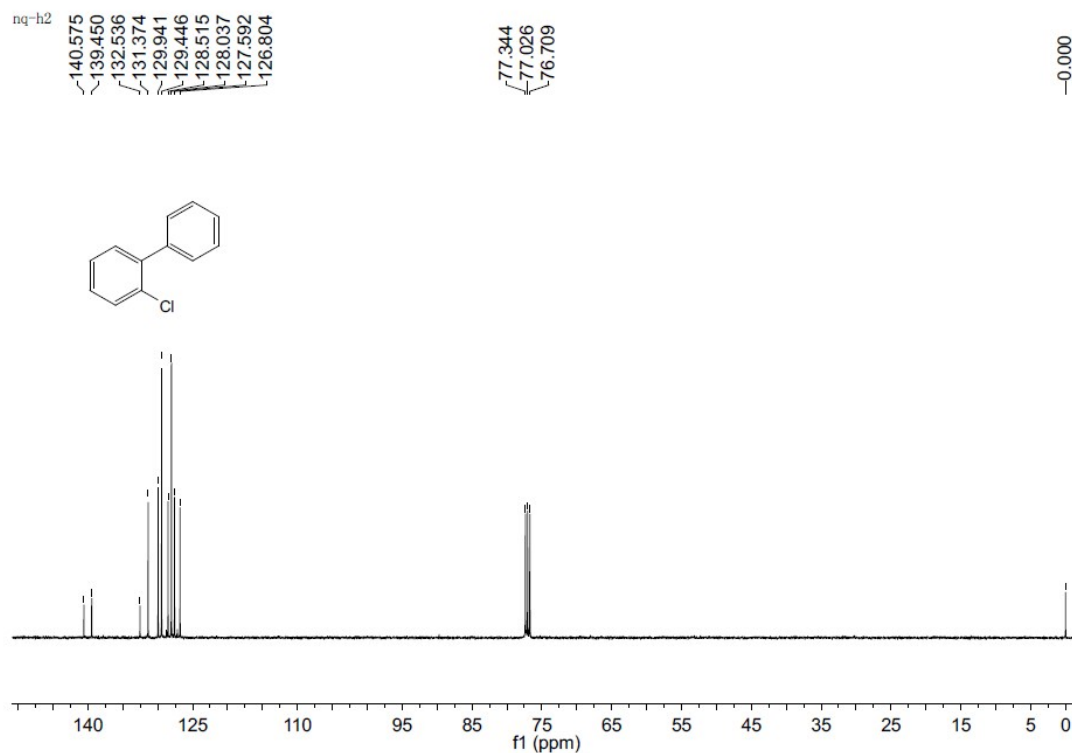

<sup>1</sup>H NMR and <sup>13</sup>C NMR spectra of compound **2w**

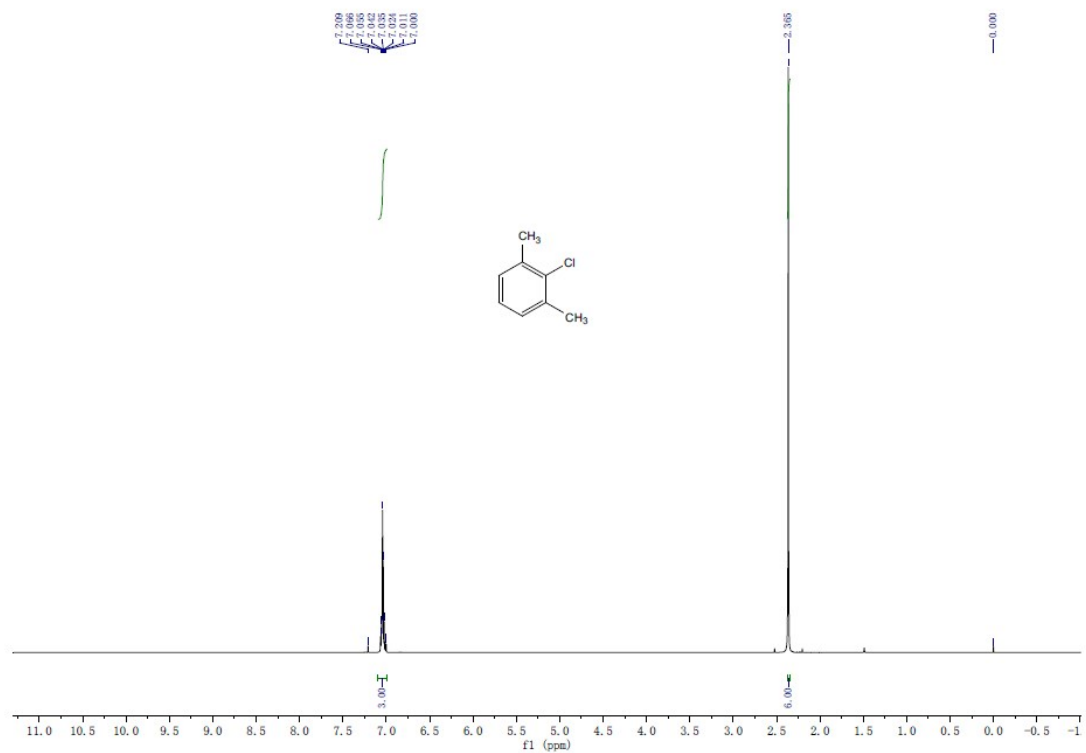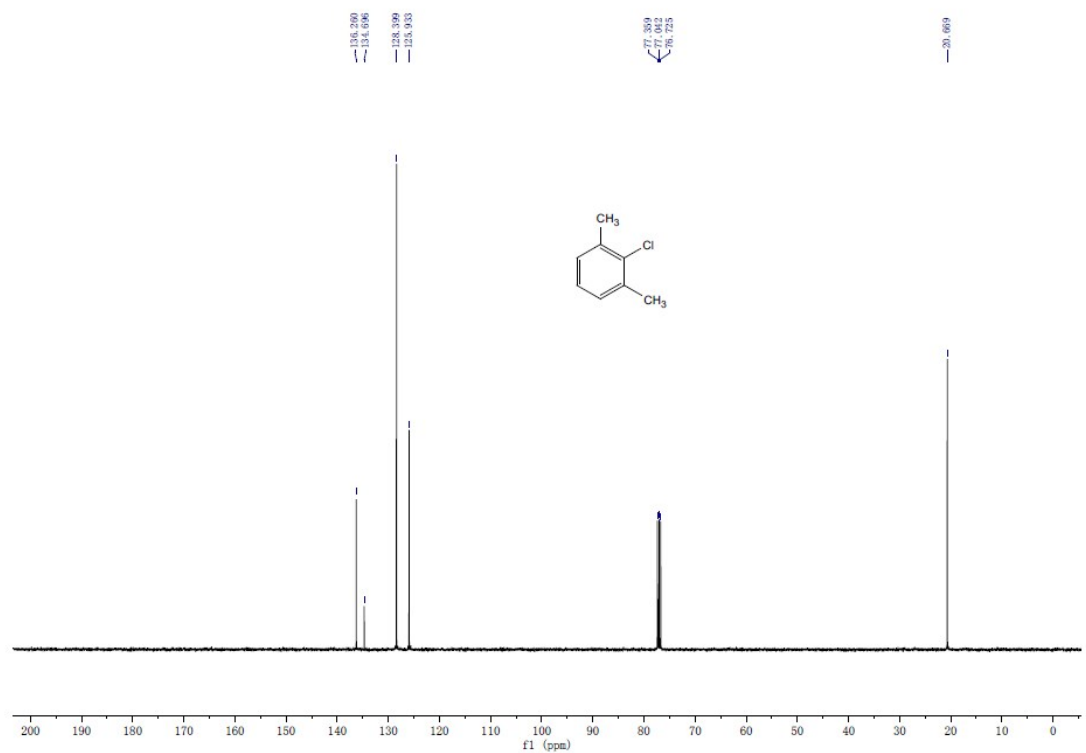

<sup>1</sup>H NMR and <sup>13</sup>C NMR spectra of compound **2x**

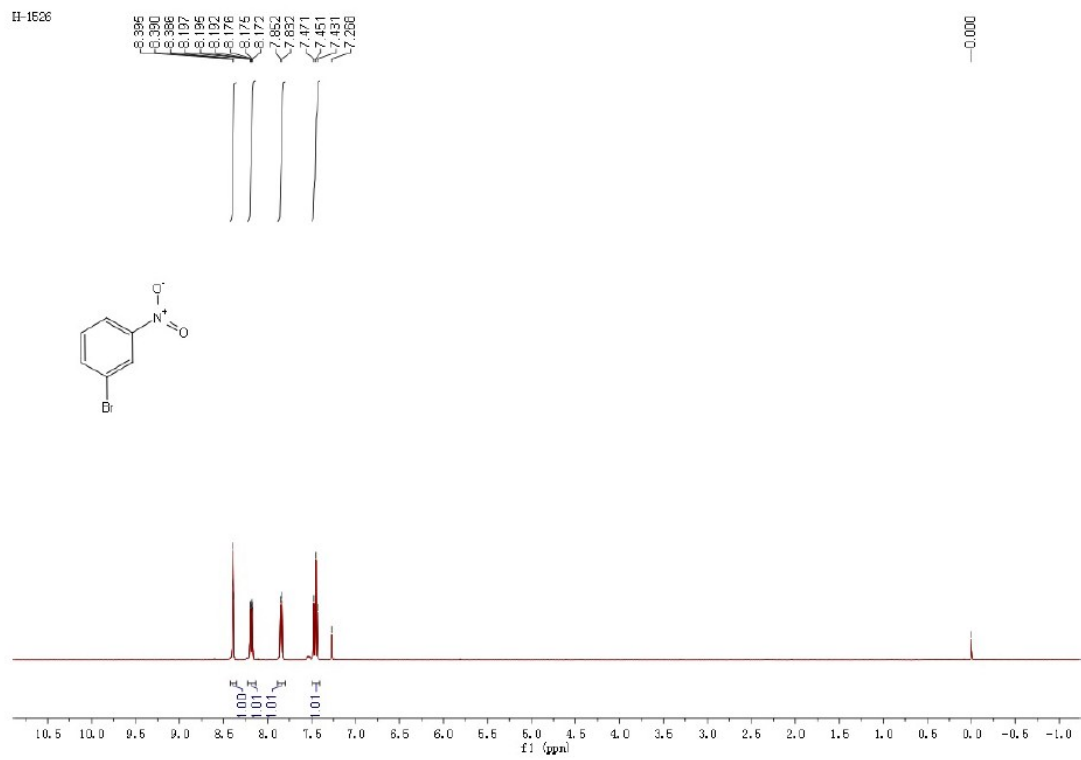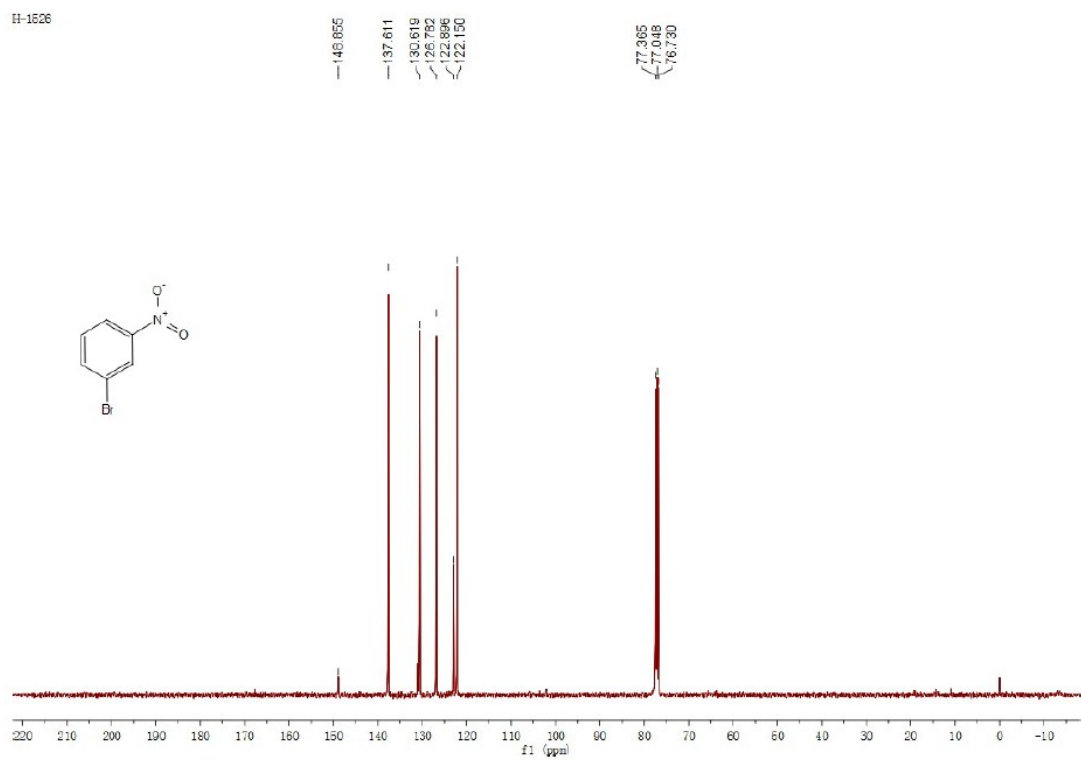

$^1\text{H}$  NMR and  $^{13}\text{C}$  NMR spectra of compound **3a**



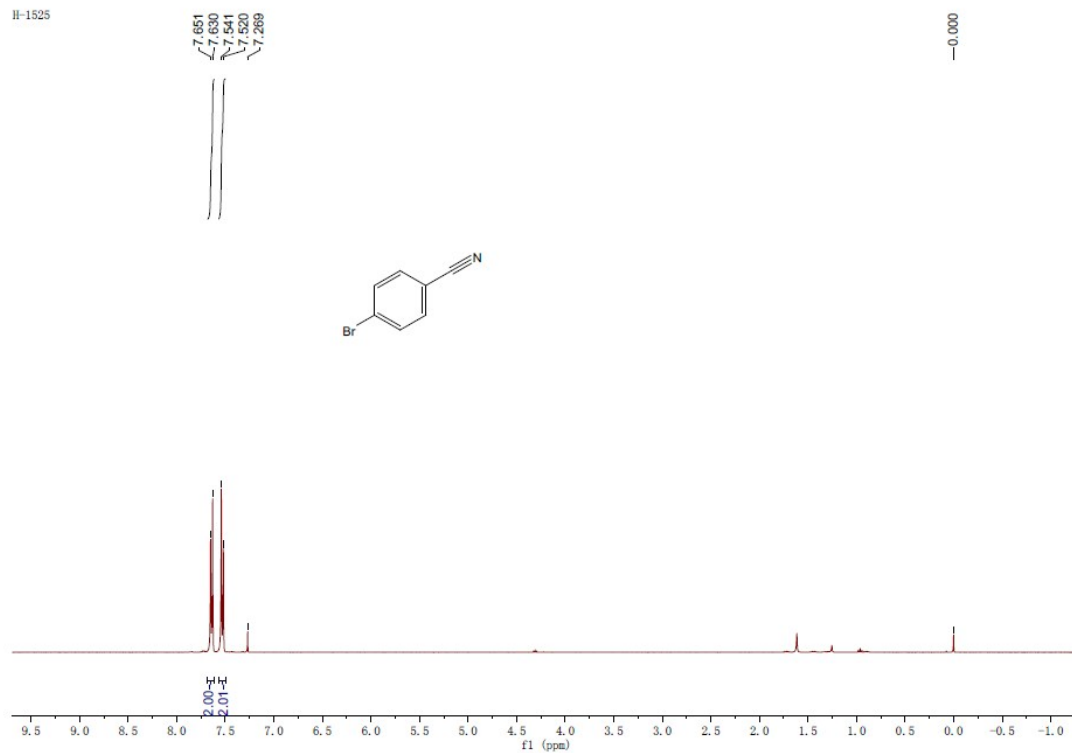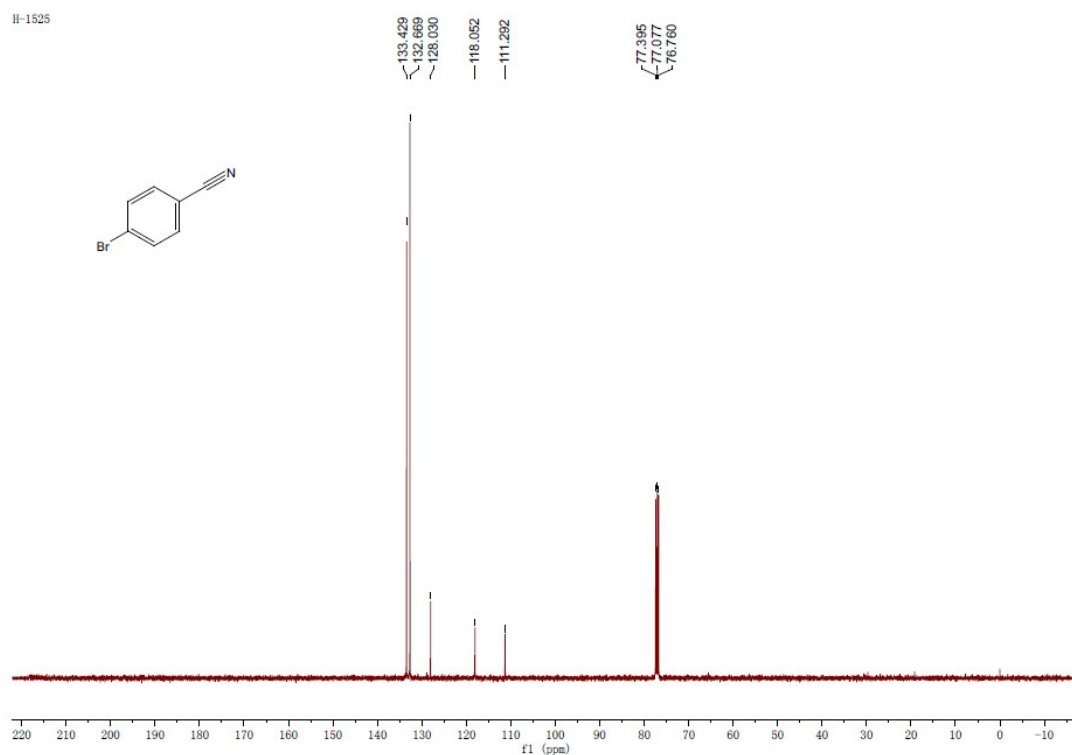

$^1\text{H}$  NMR and  $^{13}\text{C}$  NMR spectra of compound **3b**

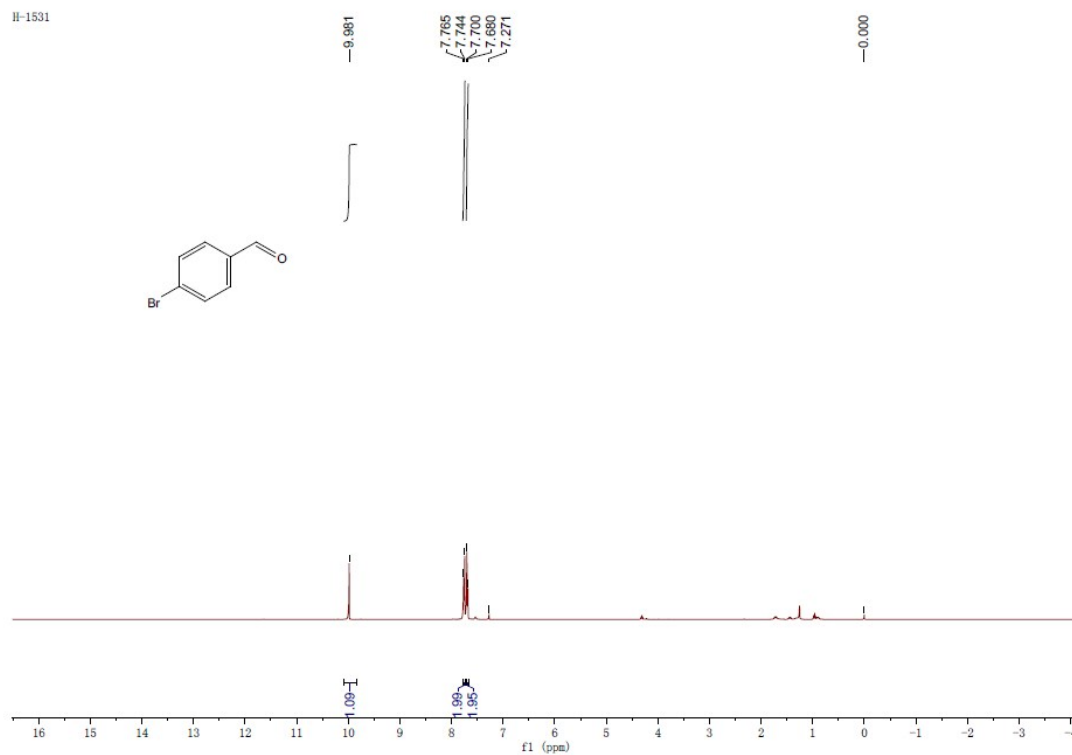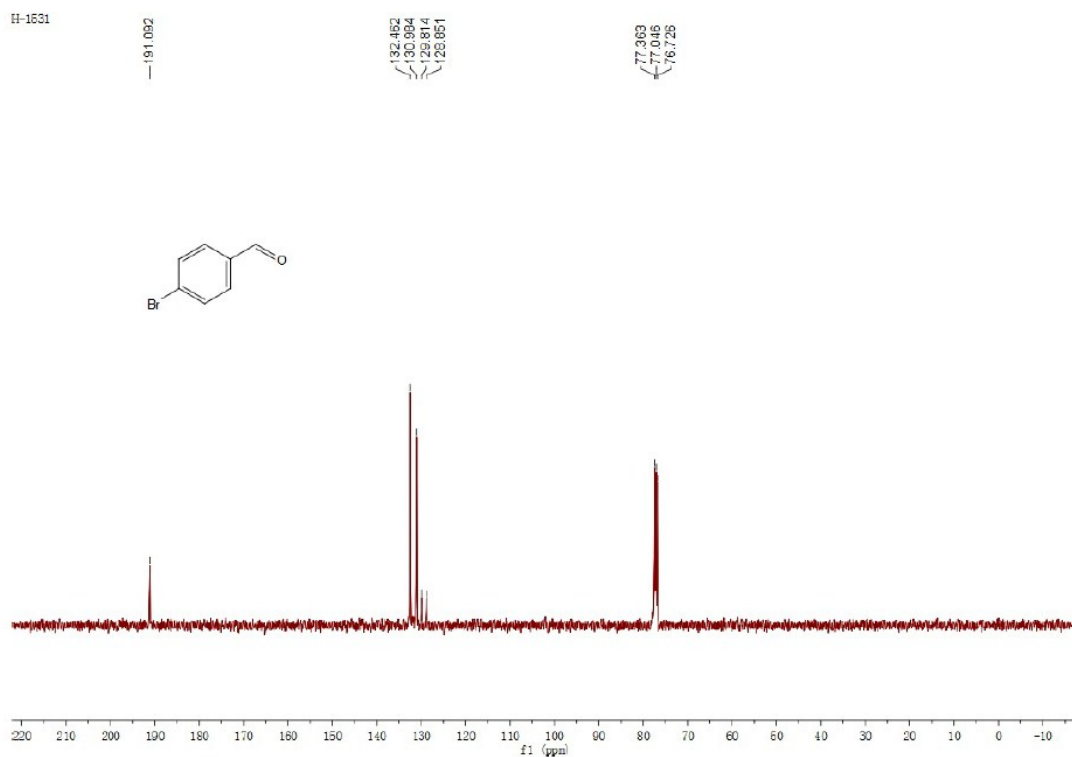

$^1\text{H}$  NMR and  $^{13}\text{C}$  NMR spectra of compound **3c**

07何文  
h-1121-1

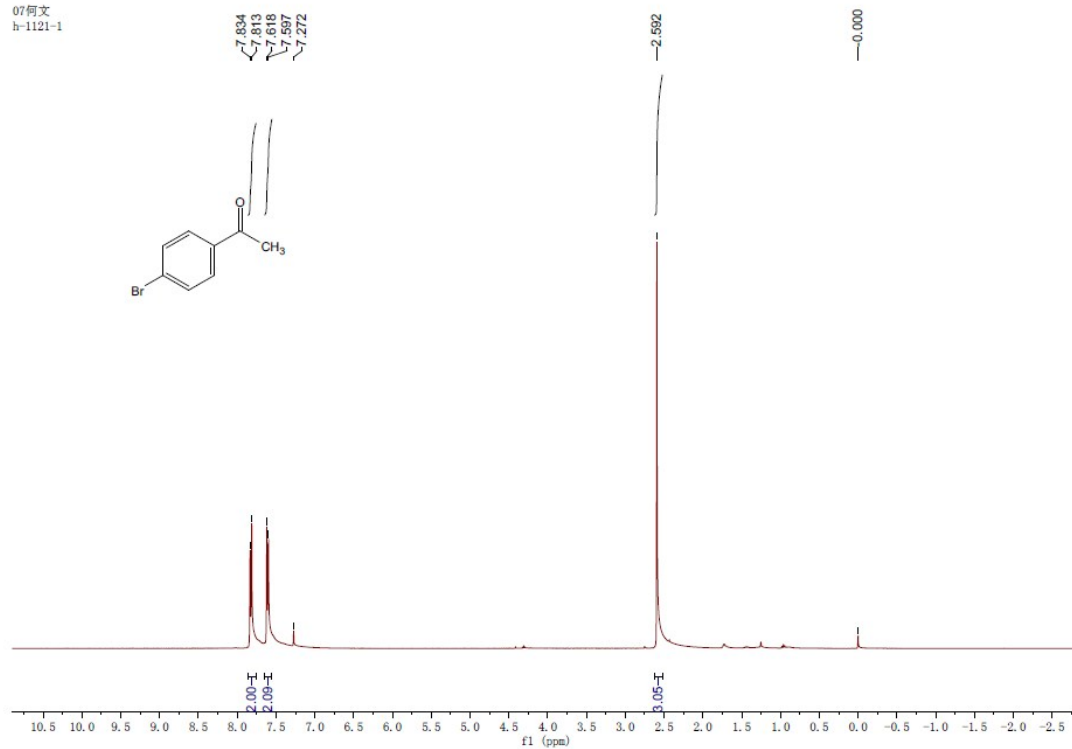

07何文  
h-1121-1

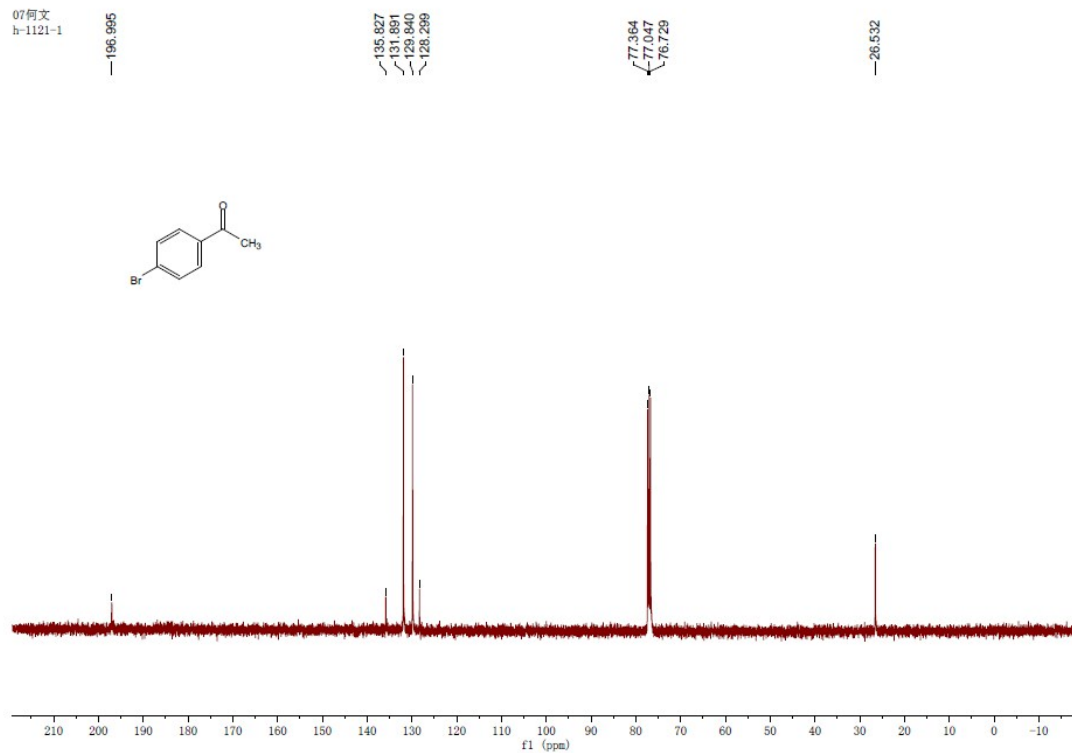

<sup>1</sup>H NMR and <sup>13</sup>C NMR spectra of compound **3d**

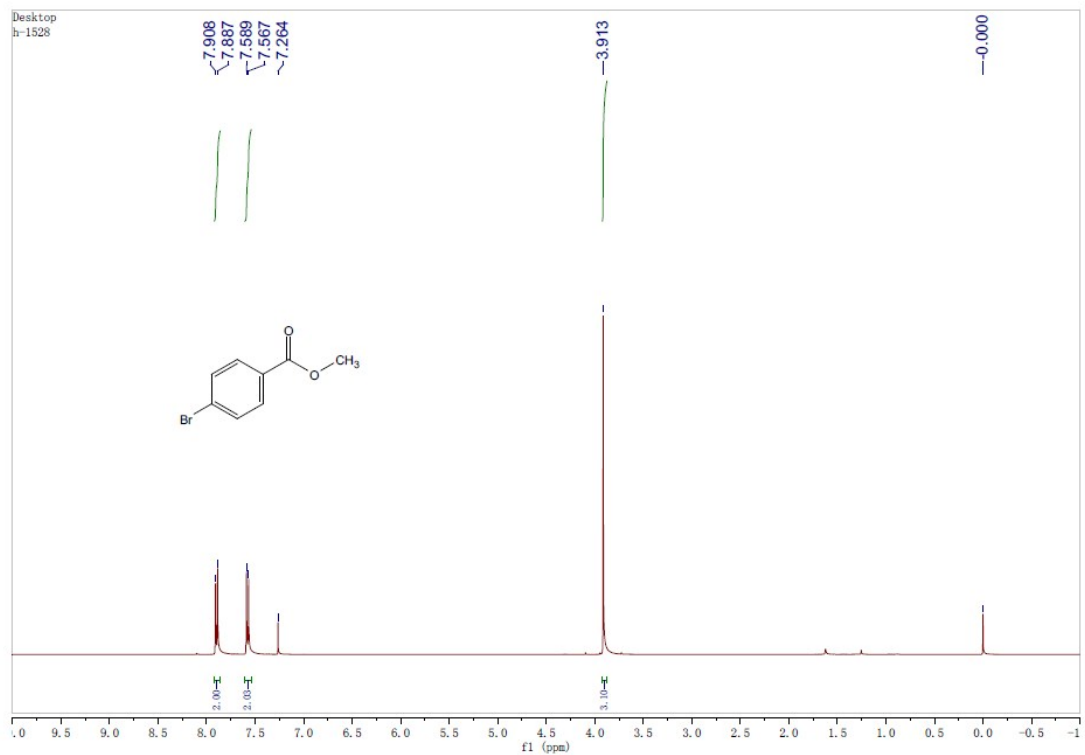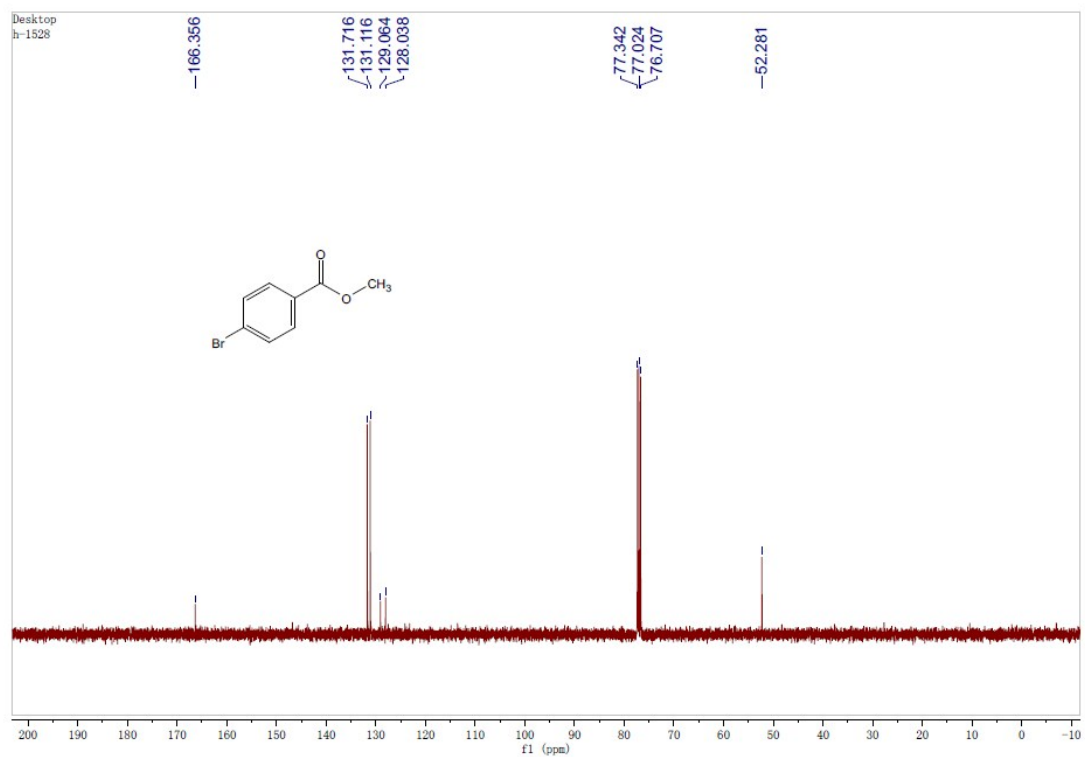

$^1\text{H}$  NMR and  $^{13}\text{C}$  NMR spectra of compound **3e**

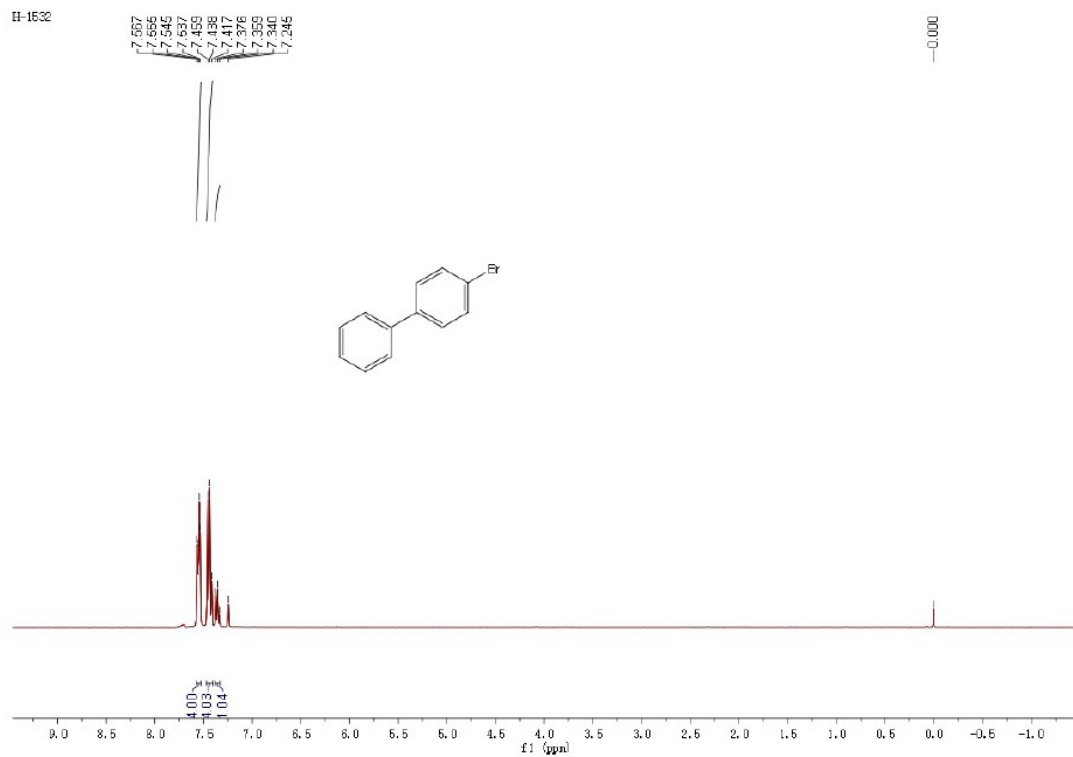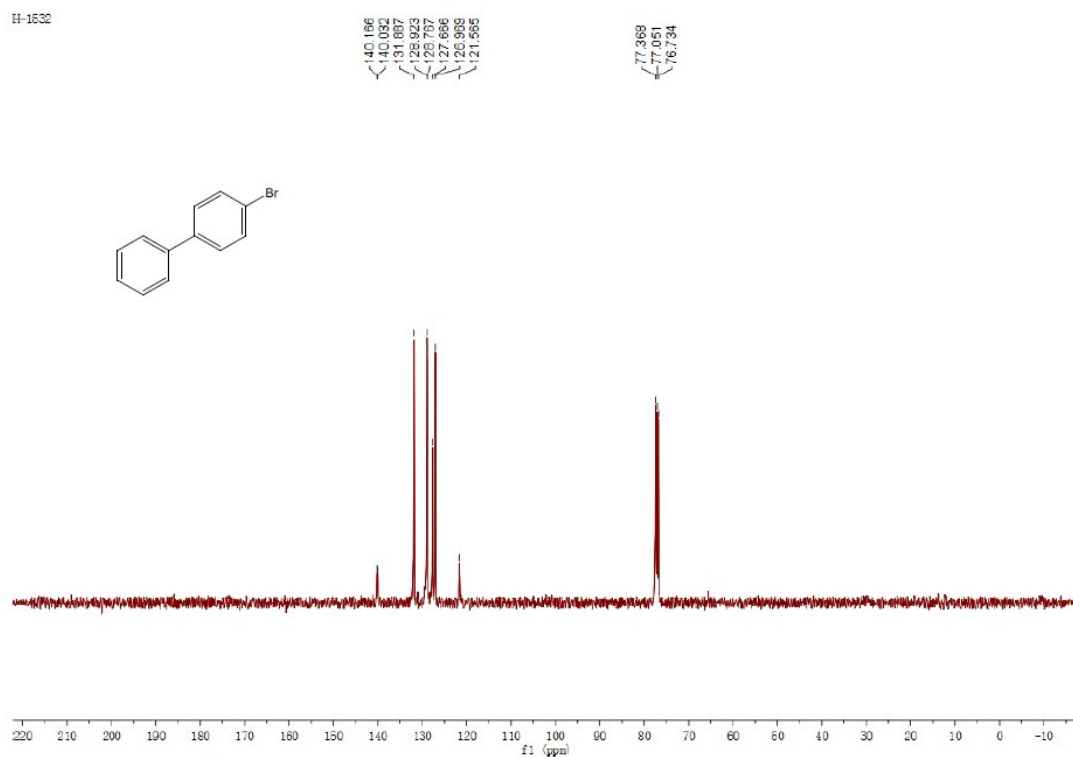

<sup>1</sup>H NMR and <sup>13</sup>C NMR spectra of compound **3f**

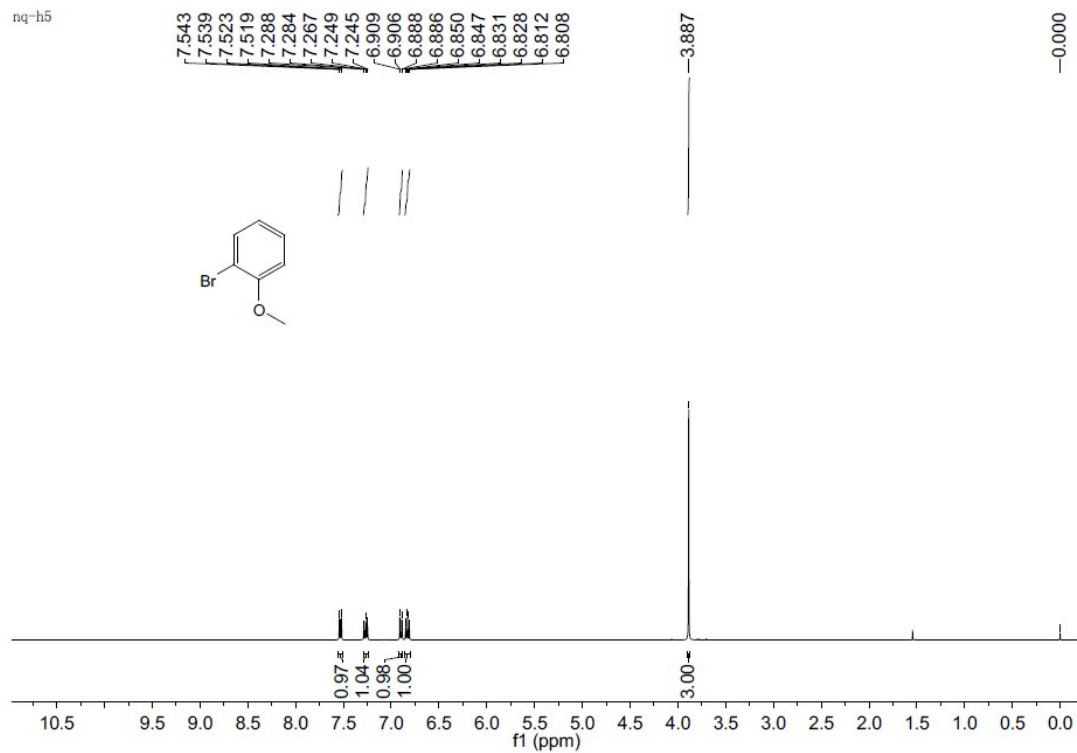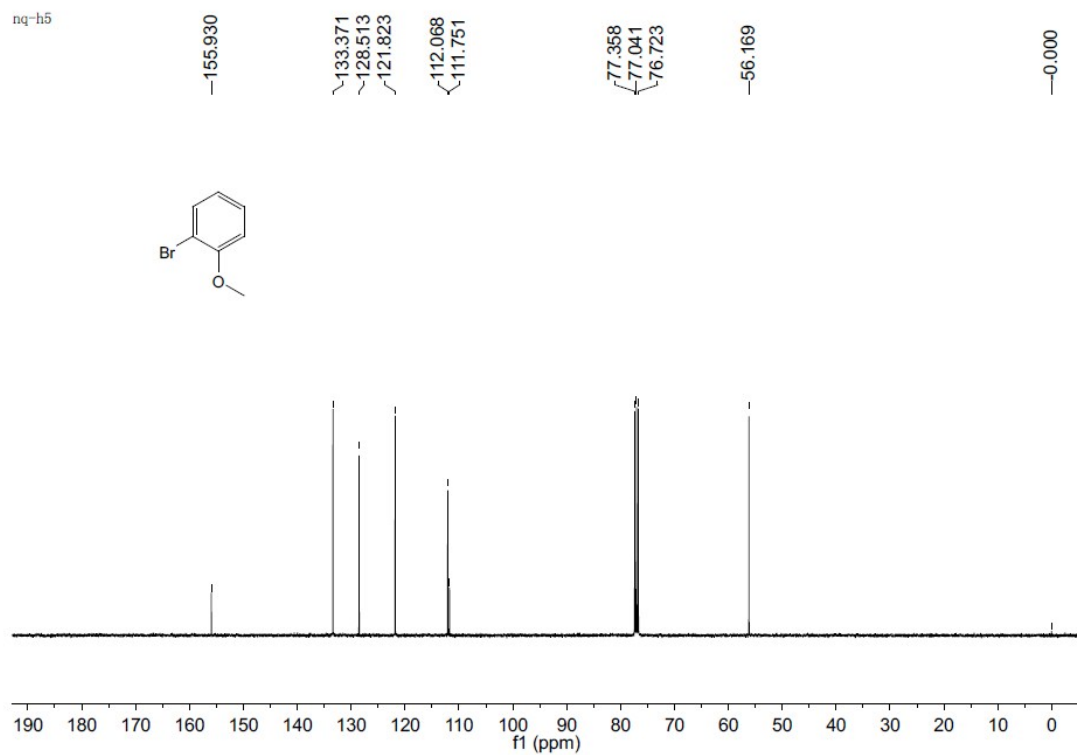

$^1\text{H}$  NMR and  $^{13}\text{C}$  NMR spectra of compound **3g**

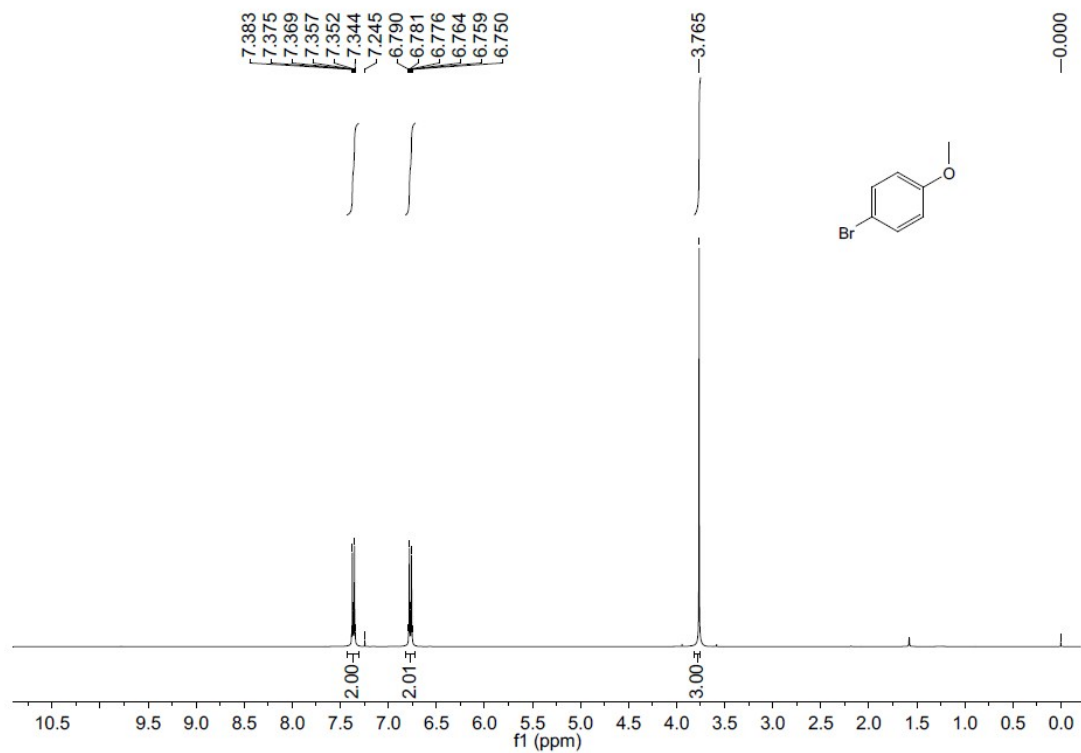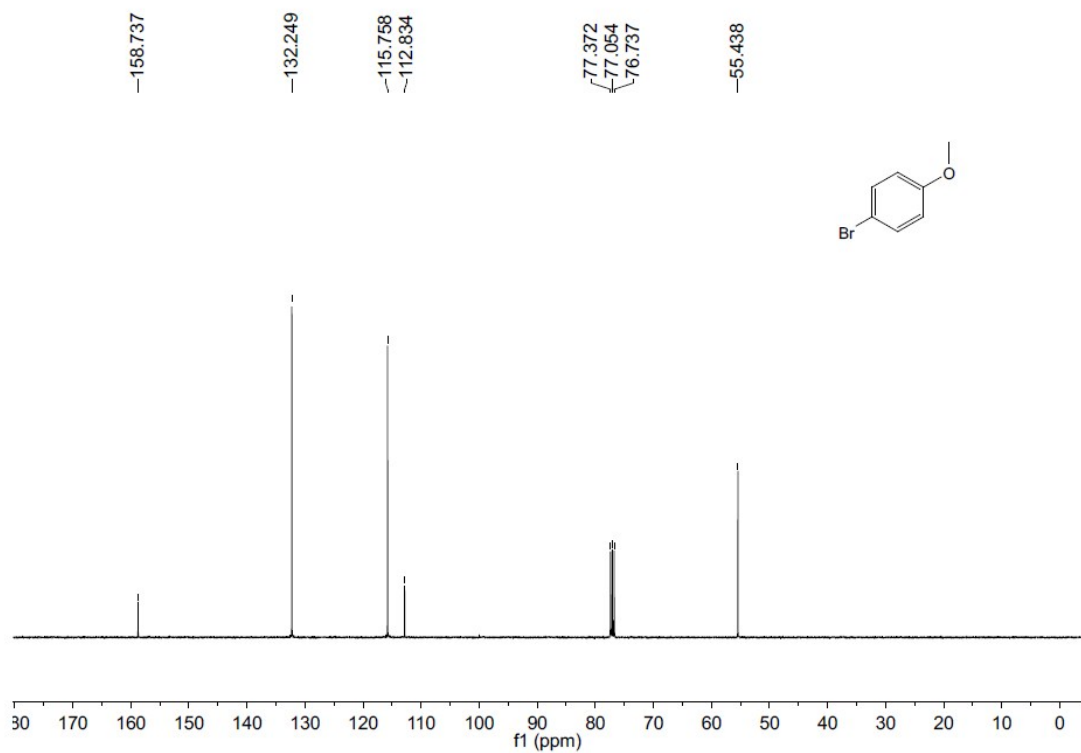

$^1\text{H}$  NMR and  $^{13}\text{C}$  NMR spectra of compound **3h**

07何文  
H-1529

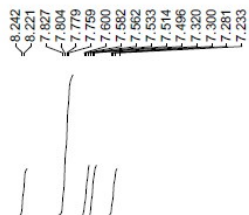

-0.000

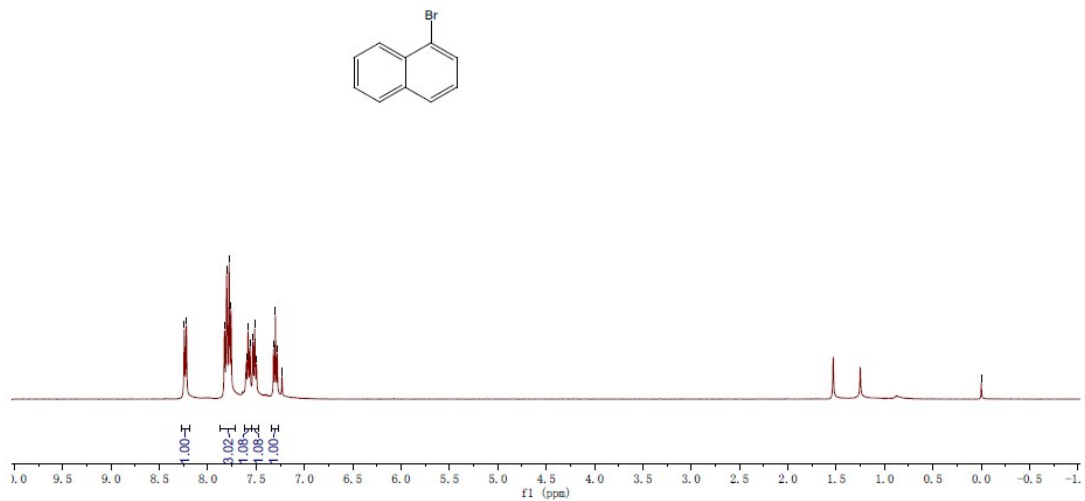

H-1529

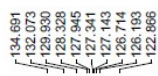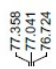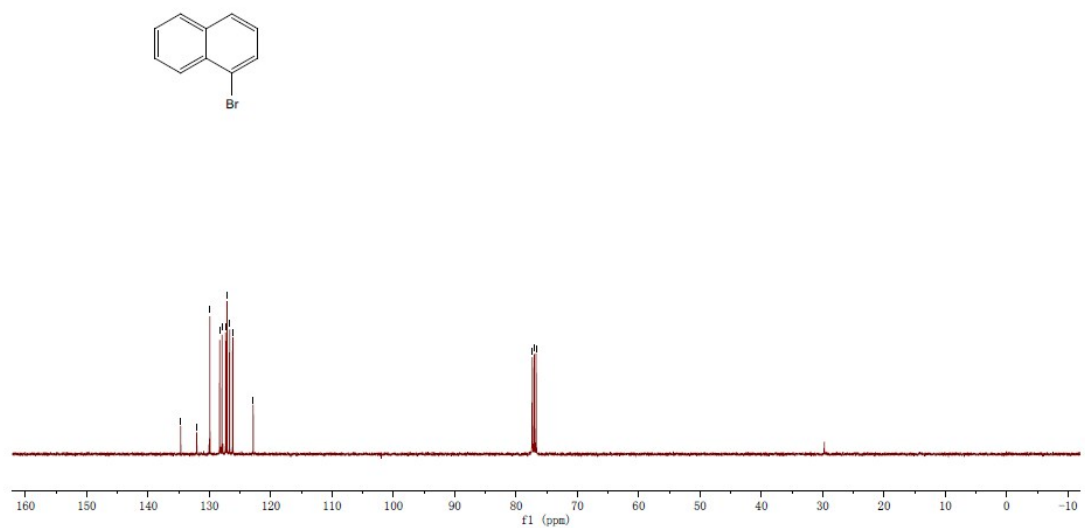

<sup>1</sup>H NMR and <sup>13</sup>C NMR spectra of compound **3i**
